1 **Title: Nanotopography enhances dynamic remodeling of tight junction proteins through cytosolic**  
2 **complexes**

3  
4 **Authors:** Xiao Huang<sup>1</sup>, Xiaoyu Shi<sup>2,3</sup>, Mollie Eva Hansen<sup>4</sup>, Cameron L. Nemeth<sup>4</sup>, Anna Ceili<sup>5</sup>, Bo  
5 Huang<sup>2,6,7</sup>, Theodora Mauro<sup>5</sup>, Michael Koval<sup>8</sup>, and Tejal A. Desai<sup>1,4\*</sup>

6  
7 **Affiliations:**

8 <sup>1</sup> Department of Bioengineering and Therapeutic Sciences, University of California, San Francisco, San  
9 Francisco, California, USA

10 <sup>2</sup> Department of Pharmaceutical Chemistry, University of California, San Francisco, San Francisco,  
11 California, USA

12 <sup>3</sup> Department of Developmental and Cell Biology, University of California, Irvine, Irvine, California, USA

13 <sup>4</sup> UC Berkeley-UCSF Graduate Program in Bioengineering, University of California, San Francisco, San  
14 Francisco, California, USA

15 <sup>5</sup> Department of Dermatology, University of California, San Francisco, San Francisco, California, USA

16 <sup>6</sup> Department of Biochemistry and Biophysics, University of California, San Francisco, San Francisco,  
17 California, USA

18 <sup>7</sup> Chan Zuckerberg Biohub, San Francisco, California, USA

19 <sup>8</sup> Division of Pulmonary, Allergy, and Critical Care Medicine and Department of Cell Biology, Emory  
20 University School of Medicine, Atlanta, Georgia, USA

21 \*Correspondence to: Tejal A. Desai, PhD (email: [tejal.desai@ucsf.edu](mailto:tejal.desai@ucsf.edu))

22  
23 **Abstract**

24  
25 The epithelial tight junction regulates barrier function and is responsive to extracellular stimuli. Here we  
26 demonstrated that contact of synthetic surfaces with defined nanotopography at the apical surface of  
27 epithelial monolayers increased paracellular permeability of macromolecules. To monitor changes in tight  
28 junction morphology in live cells, we fluorescently tagged the scaffold protein zonula occludens-1 (ZO-  
29 1) through CRISPR/Cas9-based gene editing. Contact between cells and nanostructured surfaces  
30 destabilized junction-associated ZO-1 and promoted its arrangement into highly dynamic non-junctional  
31 cytosolic complexes that averaged ~2 μm in diameter. Junction-associated ZO-1 rapidly remodeled, and  
32 we also observed the direct transformation of cytosolic complexes into junction-like structures. Claudin-  
33 family tight junction transmembrane proteins and F-actin also were associated with these ZO-1 containing  
34 cytosolic complexes. These data suggest that the cytosolic structures are novel intermediates formed in  
35 response to nanotopographic cues that facilitate rapid tight junction remodeling in order to regulate  
36 paracellular permeability.

37  
38 **Introduction**

39 Tight junctions are protein complexes at epithelial apical intercellular contact sites, which form barriers  
40 that regulate the paracellular transit of water, ions and molecules (1-3). Although their barrier forming  
41 properties and morphology suggest a static structure, in fact, tight junction associated proteins are highly  
42 dynamic, and can be acutely regulated by external stimuli to alter the extent of paracellular flux (2, 4). In

43 particular, the tight junction associated scaffold protein zonula occludens-1 (ZO-1) has been shown to be  
44 an important regulator for barrier permeability (5-9). ZO-1 is highly mobile, and readily exchanges  
45 between tight junctions and the cytosol (2, 4). This dynamic process is closely associated with binding to  
46 transmembrane tight junction proteins (e.g. claudins, JAM-A) and cytoskeletal proteins, primarily actin  
47 (5, 6, 8). Detailed understanding of the molecular anatomy of the tight junctions as well as determining  
48 how dynamic interactions between tight junction proteins dictate barrier function continue to be elucidated  
49 (2).

50 Synthetic materials fabricated with specific geometries and surface topographic features at the micro and  
51 nanoscale have the capacity to influence epithelial cell behavior (10, 11). We previously found that  
52 polymeric films with defined nanostructure, when placed in contact with the apical aspect of an epithelial  
53 monolayer, led to enhanced transepithelial permeability of macromolecules ranging in size from ~60 kDa  
54 to ~150 kDa, including bovine serum albumin and IgG (12-14). Immunolabeling of ZO-1 showed  
55 characteristic changes in tight junction morphology that were associated with increased permeability,  
56 further indicating nanotopography-induced regulation of tight junctions (12). Tight junction remodeling  
57 occurs relatively quickly (within 1 hour), is reversible, energy-requiring, and depends on MLCK (myosin  
58 light chain kinase) signaling (12, 13). However, detailing the precise timing and changes to tight junctions  
59 that occur in response to nanostructure contact remain to be determined and require specialized  
60 methodology. Specifically, commonly used methods to detect epithelial paracellular flux, including  
61 transepithelial electrical resistance (TEER) and transepithelial diffusion through porous Transwell inserts  
62 (15, 16), measure bulk epithelial layer behavior and are unable to obtain submicrometer scale precision  
63 (2). Moreover, systems incorporating fluorescently tagged proteins-of-interest for live cell imaging are  
64 frequently subject to overexpression, which can alter physiological behavior (1, 15, 17).

65 To advance our ability to analyze the effects of nanotopography on epithelial cell permeability, we  
66 developed a novel method to achieve high-resolution visualization of paracellular flux across live cell  
67 monolayers in real time, using total internal reflection fluorescence (TIRF) microscopy, which specifically  
68 images the basal side of epithelia within ~100 nm from the glass substrate (18). We also tagged  
69 endogenous ZO-1 protein under the control of its endogenous promoter with mCherry using CRISPR-  
70 Cas9 based gene editing, enabling live cell tracking of morphological changes to ZO-1. Through these  
71 advanced imaging methods and fluorescence recovery after photobleaching (FRAP) assays, we identified  
72 novel nanostructure-induced dynamics of junction-associated ZO-1. This remodeling process was  
73 mediated through the formation of cytosolic structures containing ZO-1, claudin-family transmembrane  
74 tight junction proteins and F-actin that dynamically interacted with tight junctions. These ZO-1 positive  
75 cytosolic complexes are consistent with recently reported structures induced by ZO-1 phase separation  
76 that have been implicated as mediators for tight junction formation and mechanosensing (19, 20). Our  
77 ability to use nanotopography to stimulate active tight junction remodeling by this novel biophysical  
78 process provides a basis to understand mechanisms that regulate tight junction assembly and epithelial  
79 barrier function in response to the extracellular microenvironment.

80

## 81 **Results**

82

### 83 **Nanotopographic cues induce paracellular flux of macromolecules across epithelial monolayers**

84 Human epithelial colorectal adenocarcinoma (Caco-2) cells were cultured on glass-bottomed chambers  
85 under conditions that enabled them to form a polarized monolayer (Fig. 1A, fig. S1A). The cells were  
86 then placed in contact with polypropylene films with or without a defined nanotopographic structure (Fig.

87 **1B**, fig. S1B). FITC-labeled IgG (FITC-IgG) was added to the apical side of the monolayer as a tracer for  
88 barrier permeability (**Fig. 1A**, fig. S1A). We then tracked FITC-IgG that penetrated through epithelial  
89 monolayers to the basal side with submicron resolution, using TIRF microscopy that selectively  
90 illuminated fluorophores within ~100 nm zone above the basal substrate (**Fig. 1A**). Acquired TIRF images  
91 were quantified as the mean FITC fluorescence intensity at cell-cell borders marked by bulk plasma  
92 membrane using Cell Mask Deep Red (fig. S1C). Strikingly, FITC-IgG accumulated in basolateral gaps  
93 below cell-cell borders of Caco-2 monolayer after apical contact with nanostructured (NS) films for 1  
94 hour at 37°C (**Fig. 1, C and D**), while FITC-IgG showed minimal paracellular permeability in non-treated  
95 (NT) cells (fig. S1 D and E). NS film treated cells also showed significantly higher paracellular  
96 accumulation of FITC-IgG than cells in contact with control flat (FT) polypropylene films (**Fig. 1C-E**).  
97 These data are consistent with our previous studies, which demonstrate increased paracellular permeability  
98 to macromolecules when epithelial cells are in contact with nanotopographic structures (12-14), further  
99 indicating the regulation of tight junctions through nanostructure contact. We then immunostained ZO-1  
100 in differentially treated cells (fig. S1F) given its important role in tight junction regulation (5-9). We found  
101 NS-specific effects on ZO-1 morphology, including induction of a zigzag appearance in the xy focal plane  
102 (**Fig. 1, F and G**) and xz/yz focal plane (fig. S1, G and H), and interestingly, a novel class of cytosolic  
103 complexes (**Fig. 1, F and H**).

#### 104 **Live cell imaging reveals cytosolic tight junction protein complexes induced by contact with** 105 **nanostructured films**

106 Considering NS-induced morphological changes in ZO-1 (**Fig. 1, F to H**) and its important role in tight  
107 junction regulation (8, 9), we engineered cells using CRISPR-Cas9 based genome editing to express ZO-  
108 1 tagged at the N terminus with a fluorescent reporter (mCherry) for live cell imaging. Using this approach,  
109 the ZO-1 was precisely tagged and endogenously expressed, thus maintaining its physiological activity  
110 (21) (**Fig. 2A**). Briefly, the guide RNA (gRNA) was designed to target exon2 of *TJP1* gene for site specific  
111 insertion/deletion (indel) (fig. S2A). Thereafter, the *mCherry* gene with two 1kb arms homologous to the  
112 indel site was integrated into the genome through homology directed repair (HDR) (**Fig. 2A**). Transduced  
113 Caco-2 cells were selected for mCherry expressing cells through fluorescence-activated cell sorting  
114 (FACS) (fig. S2B), followed by single clone isolation and genomic PCR confirmation (fig. S2C). The 19  
115 clones we isolated were all heterozygous with only one allele modified (fig. S2C). Isolated clones cultured  
116 on Transwells were used for phenotypic confirmation. Based on TEER analysis, clone15 had barrier  
117 function comparable to wildtype cells and thus was used for detailed imaging analysis (fig. S2D).  
118 Noticeably, live imaging and z-stack scanning of engineered cells showed the existence of cytosolic  
119 mCherry-tagged ZO-1 complexes near tight junctions, mostly adjacent to the apical surface (fig. S2F).

120 Live cells expressing mCherry-ZO-1 at physiological levels were highly susceptible to photobleaching.  
121 To minimize this effect, a spinning disk confocal microscope with high imaging speed was used for live  
122 cell imaging, where mCherry-ZO-1 fluorescence was collected at an apical 1  $\mu\text{m}$  z-depth with 0.3  $\mu\text{m}$   
123 intervals and z-projected at maximum pixel intensity for each time lapse image (**Fig. 2C**). Physical drift  
124 and vibration effects were minimized during live cell imaging using the Nikon Perfect Focus System  
125 (PFS). Interestingly, we observed the existence of relatively large cytosolic ZO-1 containing structures  
126 (~2  $\mu\text{m}$ ) at the apical side next to tight junctions when cells were in contact with NS films, whereas  
127 untreated cells and cells treated with FT films showed fewer and smaller cytosolic ZO-1 complexes (**Fig.**  
128 **2C**). We quantified (22) cytosolic structures in 40  $\mu\text{m}$  x 40  $\mu\text{m}$  apical images from 5 independent  
129 experiments (fig. S3A), and found a significantly higher number of large cytosolic ZO-1 complexes ( $d \geq$   
130 1  $\mu\text{m}$ ) in NS film-treated cells compared to untreated or FT film-treated cells (**Fig. 2, D and E**). To  
131 investigate their composition, we immunostained differentially treated cells for several markers, including

132 ZO-1, claudins, F-actin and the endocytosis marker Rab5. mCherry positive apical cytosolic structures  
133 were confirmed to be ZO-1 positive, and also co-localized with several claudins (Claudin-2, -4, -10) and  
134 F-actin (**Fig. 2F**, fig. S3, B and C). Notably, the structures were negative for Rab5 staining (fig. S3C), and  
135 were non-acidic based on a lack of LysoTracker staining (fig. S3D), indicating that they did not originate  
136 from vesicular mediated trafficking of endocytosed tight junction proteins.

### 137 **Enhanced dynamics of tight junction remodeling stimulated by nanotopography**

138 We investigated the dynamics of mCherry-ZO-1 remodeling, using time-lapse imaging of Caco-2 cells  
139 stimulated by nanotopography. We observed two patterns of cytosolic structure initiation: i) the direct  
140 transition of junction-associated ZO-1 into cytosolic structures through aggregation and departure (**Fig.**  
141 **3A-i**); ii) the clustering of diffused signals into puncta within a network next to tight junctions (**Fig. 3A-**  
142 **ii**, see movie S1). In addition, the cytosolic structures became enlarged through fusion of newly formed  
143 small structures (**Fig. 3A-iii**). Interestingly, cytosolic structures were highly dynamic in that they were  
144 observed to circulate apically while collecting more ZO-1 followed by movement toward the basal aspect  
145 of the cytoplasm (**Fig. 3A-iv**, see movie S2 and movie S3). On the other hand, we also observed the rapid  
146 reorganization of ZO-1 into junction-like structures that often originated from non-apical locations (**Fig.**  
147 **3A-i,v**). Occasionally, we saw direct conversion of spherical structures into junction-like structures (**Fig.**  
148 **3A-vi**). With TIRF imaging, we also observed ZO-1 positive junction-like structures at the basal side of  
149 Caco-2 monolayer stimulated by apical contact with nanotopography (fig. S4A). The appearance of basal  
150 ZO-1 positive strands suggests that apical contact with NS films may induce cells to reorient their apical-  
151 basolateral axis.

152 In contrast, we did not observe active ZO-1 remodeling in cells that were either untreated or in contact  
153 with FT films, where instead there was minimal interaction between tight junctions and apical cytosolic  
154 structures. Moreover, there were fewer and smaller ZO-1 positive cytosolic complexes in cells that were  
155 not NS-treated (fig. S4, B and C).

156 We then used FRAP at selected regions to quantify and compare the remodeling rate of tight junctions in  
157 response to NS contact (**Fig. 3B**). Importantly, we found that mCherry-ZO-1 fluorescence at tight  
158 junctions recovered faster after photobleaching in cells stimulated by NS films, as compared to untreated  
159 cells and FT film treated cells (**Fig. 3C**). This further supports that there is enhanced remodeling of  
160 junctional ZO-1 being induced by nanotopographic cues.

161 To examine the dynamics of a transmembrane tight junction protein in live cells, we transfected mCherry-  
162 ZO-1 expressing Caco-2 cells with exogenous YFP-claudin-3 using an adenovector expression construct  
163 (23) (**Fig. 4A**). The virus titer was optimized to minimize YFP-claudin-3 overexpression although this did  
164 result in heterogeneous expression by different cells in the monolayer (**Fig. 4B**). YFP-claudin-3 and  
165 mCherry-ZO-1 co-localized at apical cytosolic structures in NS film-treated cells (**Fig. 4B**), but not  
166 untreated cells or FT film-treated cells (fig. S5). Importantly, claudin-3 was present in ZO-1 containing  
167 cytosolic structures at sites of formation and sites of interaction with tight junctions (**Fig. 4, C and D**, see  
168 movie S4). The co-localization of the transmembrane tight junction protein claudin-3 with cytosolic  
169 scaffold protein ZO-1 indicates that cytosolic complexes involve the regulation of multiple classes of tight  
170 junction proteins, including transmembrane proteins.

171

### 172 **F-actin engages during the formation of cytosolic tight junction complexes**

173 ZO-1 interconnects transmembrane junction proteins (e.g. claudins) and cytoskeletal F-actin in epithelial  
174 cells (5, 6). We imaged F-actin labeled with SiR-actin in live cells under NS and FT film treatment, to



175 investigate the changes in cytoskeletal morphology in response to different stimuli (**Fig. 5A**). We observed  
176 apparent clustering of F-actin in cells upon NS film treatment as opposed to untreated cells or FT film  
177 treated cells. These clusters formed in response to NS contact translocated from the apical aspect of the  
178 cells to the basal side over 1.5 hour (fig. S6A). More specifically, F-actin interacted with ZO-1 proteins  
179 during tight junction remodeling in different ways (see movie S5): i) F-actin replaced sites of ZO-1 protein  
180 localization at tight junctions (**Fig. 5B-i**); ii) F-actin intertwined with ZO-1 in cytosolic complexes sitting  
181 next to tight junctions (**Fig. 5B-ii**); iii) polarized cytosolic F-actin-ZO-1 structures (**Fig. 5B-iii**) with the  
182 F-actin portion facing towards iv) larger solid integrated structure (**Fig. 5B-iv**); and v) F-actin and ZO-1  
183 co-localized in large (>2  $\mu\text{m}$ ) hollow structures (**Fig. 5B-v**). In some instances, F-actin:ZO-1 containing  
184 structures merged into larger co-localized structures (**Fig. 5C**). And interestingly, there were instances  
185 where F-actin dissociated from ZO-1 containing cytosolic structures (**Fig. 5, D and E**). Consistent with  
186 this, cytosolic structures containing both ZO-1 and Claudin-3 lacked F-actin (**Fig. 5, F and G**), indicating  
187 that interactions of F-actin with cytosolic complexes are transient and F-actin dissociates as the complexes  
188 mature.

189 Taken together, our data support the hypothesis that NS materials in direct contact with the apical surface  
190 of epithelial cells induce F-actin rearrangements. The rearrangements are coordinated with changes in  
191 localization and morphologies of its binding partner, ZO-1. Transition of junction-associated ZO-1 into  
192 large cytosolic complexes also recruit other tight junction proteins, suggesting a new mechanism of tight  
193 junction regulation by biophysical stimuli (**Fig. 5H**).

194

## 195 **Discussion**

196 Tight junctions, comprised of heavily cross-linked complexes of transmembrane and membrane-  
197 associated proteins, represent a structural determinant of epithelial cell polarity and regulate solute  
198 paracellular permeability (1, 3). Tight junctions are highly dynamic, even in unstimulated cells, and are  
199 acutely regulated by multiple extracellular biological stimuli including hormones and cytokines (2, 4). We  
200 previously found *in vitro* and *in vivo* that cell contact with polymeric films with defined nanotopographic  
201 features enhances transepithelial permeability to macromolecules in the size range of (60 kDa to 150 kDa)  
202 (12-14). Here, for the first time, we used state-of-the-art TIRF microscopy to visualize paracellular flux  
203 of FITC-labeled IgG with submicron resolution at the basal aspect of live epithelial monolayers stimulated  
204 with a nanostructured biophysical cue on the apical surface. The ability to image transepithelial flux in  
205 live cell monolayers provided more detailed morphological information than methods measuring bulk  
206 solute flow and enabled us to demonstrate that the paracellular route is a major pathway for nanostructure-  
207 induced transepithelial permeability.

208 ZO-1 has been shown to play an essential role in the maintenance and regulation of tight junction  
209 permeability (8, 9, 20). To track the intracellular distribution of ZO-1 in live cells, we used CRISPR-Cas9  
210 based gene editing to attach a fluorescent mCherry reporter to the N-terminus of endogenous ZO-1.  
211 Engineered ZO-1 expression was driven by its endogenous promoter which ensured that it was expressed  
212 and regulated at physiologically relevant concentrations avoiding pitfalls related to overexpression (1, 19).  
213 Live imaging and FRAP analysis of cells triggered by nanostructured films revealed a change in the  
214 kinetics of ZO-1 turnover associated with the response of tight junctions to the contact between cells and  
215 NS films. Our findings also are consistent with previous studies demonstrating that tight junction  
216 associated ZO-1 is highly mobile and exchanges with the cytosolic pool (2, 4). Furthermore, the imaging  
217 methods used here also enabled us to identify a novel intermediate involved in nanostructure-induced  
218 remodeling tight junctions, namely, large (~2  $\mu\text{m}$  diameter) cytosolic ZO-1-containing complexes that co-  
219 localize with claudin-family proteins and, in some cases F-actin. This ZO-1 positive cytosolic structure

220 has the characteristics of a newly described complex that forms as a result of liquid-liquid phase separation  
221 of ZO-1 (19). Phase separation of ZO-1 and its accompanied junctional proteins was also reported as an  
222 important intermediate for tight junction assembly (19) and mechanosensing (20). Here we extend these  
223 observations by showing that a nanostructured surface with the capacity to increase transepithelial  
224 permeability also induces the formation of ZO-1 positive cytosolic complexes in conjunction with an  
225 increase in tight junction remodeling. In addition, the previous studies demonstrated the formation of  
226 liquid-liquid phase separated ZO-1 complexes in cell free systems and cells overexpressing ZO-1 (19).  
227 Critically, the engineered cells we examined expressed comparable, physiologic levels of mCherry-ZO-1  
228 as untagged ZO-1, thus demonstrating the formation of these complexes can occur in response to a  
229 physiologic stimulus and was not driven by protein overexpression.

230 ZO-1 is a peripheral tight junction protein that interconnects transmembrane tight junction proteins (e.g.  
231 claudins, occludin, JAM) and F-actin (5, 6). Based on structure-function analysis, ZO-1 phase separation  
232 was attributed to the unfolding of the PSG (PDZ-SH3-GuK) domain, which is directly regulated by  
233 binding to the F-actin cytoskeleton (7, 9, 19). Moreover, it has been previously shown that ZO-1 positive  
234 cytosolic complexes are associated with the actin cytoskeleton that facilitated their delivery to nascent  
235 tight junctions in response to changes in tension that occur during gastrulation (20). Consistent with this  
236 model, we also observed that F-actin transiently interacted with cytosolic structures in response to  
237 nanotopography. A role for tension in the formation of ZO-1 cytosolic complexes is also suggested by the  
238 observation that integrin stimulation is required for nanotopography-induced epithelia permeability (12,  
239 13). We also found that ezrin, a cytosolic scaffold protein that links the actin cytoskeleton to cellular  
240 membrane receptors (24), was upregulated in NS-treated cells (fig. S6B). Thus, a signal transduction  
241 pathway from membrane receptors to ezrin, F-actin, ZO-1, and then to other junctional proteins, may  
242 transduce physical signals from cell apical contacts to modulate tight junction function. This agrees with  
243 the recent work demonstrating that ZO-1 phase separation mediates mechano-sensing of tight junctions  
244 (20).

245 In summary, we have developed a series of advanced imaging methods that enabled the visualization of  
246 transepithelial penetration at submicron resolution and the analysis of tight junction protein dynamics in  
247 live cells. Using these approaches, we found that there were hallmark changes in ZO-1 trafficking that  
248 were associated with increased paracellular permeability of macromolecules induced by nanotopographic  
249 cues. Of particular interest, our data demonstrate that unique ZO-1 containing cytosolic complexes can be  
250 induced to interact with tight junctions to regulate their permeability. Our data also underscore that  
251 nanotopography is a unique stimulus for fast and reversible modulation without permanent loss of  
252 epithelial monolayer integrity. In addition, the imaging techniques shown here have general applicability  
253 to understanding the mechanistic basis for tight junction permeability and how barrier function can be  
254 modulated by other stimuli in real time at the level of individual intercellular junctions.

255  
256

## 257 **Materials and Methods**

### 258 **Cell lines and culture**

259 Caco-2 human colon epithelial cell line was purchased from ATCC (#HTB-37). Unless specified, cells  
260 were cultured in DMEM (Sigma, #D5796) supplemented with 20% FBS (Gemini Bio #100-106), 100 mM  
261 sodium pyruvate (Sigma #113-24-6), and penicillin-streptomycin (Sigma #516106) incubated in 5% CO<sub>2</sub>  
262 at 37°C. The cells were subcultured at 90% confluency by trypsinization with 0.25% trypsin-EDTA (SM-  
263 2003). For transepithelial electrical resistance (TEER) measurements, cells were seeded in a 6.4 mm  
264 Transwell inserts (Corning #353495) with 300  $\mu$ L medium containing 84,000 cells/cm<sup>2</sup> seeded in the

265 upper chamber and 500  $\mu$ L medium in the bottom chamber. The medium was replenished every other day,  
266 and TEER was measured using a voltohmmeter (World Precision Instruments) from day 6-16 where the  
267 measured resistance in Ohms was multiplied by the area of the Transwell filter (0.3 cm<sup>2</sup>). For live cell  
268 imaging, 200,000 cells were seeded on a 35 mm glass bottom dish with 14 mm micro-well #0 cover glass  
269 (Cellvis #D35-14-0-N), which was precoated with 0.3 mg/mL Matrigel (Corning #354234) at 37°C for 30  
270 minutes. Cell culture medium was replenished every other day. After 8-10 days, the monolayer was  
271 exchanged with cell imaging medium containing FluoroBrite DMEM Media (Thermo #A1896701) and  
272 20% FBS for live cell imaging analysis.

### 273 **CRISPR/Cas9 knock-in in Caco-2 cells**

274 To generate an N-terminal mCherry knock-in in the initial exon of ZO-1, guide RNA (gRNA) for  
275 CRISPR/Cas9 mediated site-specific gene editing was designed using Benchling CRISPR tool  
276 ([www.benchling.com](http://www.benchling.com)). gRNA targeting *TJPI* gene exon number 2 -  
277 5'CCTTTATCAGAGCACAGCAA3' was synthesized and complexed with trans-activating crRNA by  
278 IDT. 500,000 Caco-2 cells were suspended in 100  $\mu$ L buffer (Lonza #VCA-1002) supplemented with 264  
279 pmol gRNA duplex, 10  $\mu$ g Cas9 expression plasmid (GE Healthcare #U-005100-120), and 10  $\mu$ g repair  
280 plasmid (Genscript, Note S1), followed by electroporation using program B024 of Nucleofector™ 2b  
281 Device (Lonza #AAB-1001). Cells were then plated in one well within a 24-well plate supplemented with  
282 1 mL medium. To validate CRISPR/Cas9 and gRNA mediated site-specific insertion/deletion (indel), cells  
283 from the transfection without repair plasmid were collected after 3 days for genome extraction (Bioline  
284 #BIO-52066) and PCR (NEB #M0491S) at the region of indel (forward primer:  
285 5'TGTTTGTGACGTTAAAGCAGCC3', reverse primer: 5'CACAAACTTACCCTGTGAAGCG3').  
286 Genome indel was assessed by T7 Endonuclease I assay (NEB #M0302) followed by SDS-PAGE gel  
287 electrophoresis (Genscript #M42012L). Seven days after the transfection of the complex including the  
288 repair plasmid, cells were collected and sorted by FACS (Sony SH800) for enrichment of mCherry  
289 positive cells. Enriched cells were plated and subcultured in 10 cm dishes at 3000 cells per dish to produce  
290 single cell clones. Nineteen clones were isolated after 2 weeks, further expanded, and confirmed for  
291 mCherry knock-in through genome extraction, PCR (using the same primer pair as above) and analyzed  
292 by agarose gel electrophoresis.

### 293 **Nanostructured film fabrication and cell treatment**

294 Nanostructured films were made, as previously described (12-14), by nanoimprint lithography in which  
295 polypropylene was heated above its glass transition temperature and pressed into a silicon mold. Molds  
296 were fabricated using electron beam lithography followed by anisotropic reactive ion etching to generate  
297 precise submicron structures. Nanostructured films were characterized using a Phenom scanning electron  
298 microscope (SEM). Nanostructured films or flat (unstructured) films (outside of the imprinted region)  
299 were biopsy punched into 6 mm diameter circles, the backside of which was glued to a polyethylene  
300 terephthalate film with a 0.3-inch of pipette tip attached. This device was placed in direct contact with a  
301 cell monolayer on the apical side and precision weighted with two metal rings of ~0.2 g and used for cell  
302 studies.

### 303 **TIRF microscopy for paracellular flux analysis**

304 Caco-2 cell monolayers, cultured on glass-bottom tissue culture dishes, were stained for plasma  
305 membranes (CellMask Deep Red Stain, 5  $\mu$ g/mL, Thermo #C10046) and nuclei (Hoechst 33342, 5  $\mu$ g/mL,  
306 Thermo #H3570) at 37°C for 10 mins in DMEM medium without FBS, followed by two rinses using cell  
307 imaging medium. An NS (nanostructured ) or FT (flat) film device was placed in contact with cells on  
308 apical side along with FITC-IgG (Sigma #F9636) supplemented to the cell imaging medium at 10  $\mu$ g/mL.

309 After 1 h incubation at 37°C, live cells were imaged using an OMX-SR microscope (GE Health Care) in  
310 the ring-TIRF mode equipped with PCO Edge 5.5 cMOS cameras, 4-line laser launch 405/488/568/60nm  
311 (Toptica), and live cell chamber at 37° with 5% CO<sub>2</sub>. Images were acquired using a Plan ApoN 60x/1.42  
312 (Olympus) oil immersion objective with laser liquid 1.518 (Cargile), and filter sets for DAPI (435/31),  
313 GFP (528/48), mCherry (609/37) and Cy5 (683/40). Registration alignment was determined using an  
314 image registration target slide (GE Health Care, pat #52-852833-000) and processed with SoftWoRx 7.0.0.  
315 software (GE Health Care). To quantify paracellular permeability of FITC-IgG, cell-cell border area in  
316 each image was outlined by a mask, generated using signals from plasma membrane stain, using Fiji  
317 software. Mean pixel intensity of FITC signal was analyzed within mask-identified area.

### 318 **Confocal microscopy of live Caco-2 cells**

319 Caco-2 cells were fluorescently labeled for different proteins and cell machineries as specified before live  
320 cell film device treatment and imaging. For fluorescence tagging of claudin-3, adenovirus carrying YFP-  
321 claudin-3 gene were prepared as described (23), and added to Caco-2 cells at ~100 MOI (multiplicity of  
322 infection) 2 days prior to imaging. Adenovirus containing medium was removed by fresh medium  
323 exchange one day after infection. For F-actin staining, SiR-actin (Cytoskeleton, #CY-SC001) was added  
324 into the medium at 0.2 μM the day before imaging, and the medium was replenished with the imaging  
325 medium right before imaging. For lysosome staining, LysoTracker Blue (Invitrogen #L7525) was added  
326 to the cell culture medium at 60 nM and incubated for 1 h at 37°C, followed by the imaging medium  
327 replenishment prior to imaging. Live cell images were acquired within 90 minutes after the treatment of  
328 film device, on a spinning disk confocal microscope (Nikon Ti inverted microscope with Andor Borealis  
329 CSU-W1 spinning disk and Andor Zyla 4.2 sCMOS camera) equipped with Plan Apo VC 100x/1.4  
330 (Olympus) oil immersion objective, 4-line laser launch 405/488/561/640nm (Andor), and live cell  
331 chamber at 37° with 5% CO<sub>2</sub>. The microscope was controlled using micro-manager, and the Nikon Perfect  
332 Focus System was used to adjust for axial focus fluctuations.

### 333 **Fluorescence recovery after photobleaching (FRAP)**

334 FRAP experiments in cells were carried out using the Nikon spinning disk confocal microscope described  
335 above with the following settings. Each regions of interest (ROI), less than 10 μm x 10 μm, was bleached  
336 using a 473 nm diode with 30 mW at the back focal plane of the objective with 10 repeats. Several  
337 junctions within the field of view were bleached but only one junction per cell. Pre-bleach and post-bleach  
338 images were acquired with a 561 nm laser with 30 mW and 300 ms exposure. Fluorescence recovery of  
339 mCherry was monitored for 200 s with a time resolution of 20 s. Mean fluorescence intensity (MFI) of  
340 the bleached area was quantified by Fiji software, and cell movements during the recovery were corrected  
341 by manual adjustment. Image groups were blinded for the analyzer during the quantification. Relative  
342 FRAP efficiency was calculated using the following formula (t: time point, BB: before bleach, AB: after  
343 bleach), and compared among different treatment groups: NT (non-treated), FT (flat), and NS  
344 (nanostructured).

$$345 \quad \% \text{ Recovery} = \frac{\text{MFI}(t) - \text{MFI}(\text{AB})}{\text{MFI}(\text{BB}) - \text{MFI}(\text{AB})} \times 100\%$$

### 346 **Quantification of cytosolic complexes**

347 A 40 μm x 40 μm frame that covers cell apical side with tight junctions in each image was selected and  
348 the cytosolic ZO-1 complexes were quantified using ImageJ with following steps (22). The image was  
349 first applied a median-blur filter to reduce noise, followed by segmentation of cytosolic structures using  
350 the interactive h-maxima watershed tool, where parameters including seed dynamics, intensity threshold,



351 and peak flooding, were optimized and kept constant for images across treatments within the same  
352 independent experiment. The binary image generated from the watershed results included the majority of  
353 cytosolic structures and a portion of tight junctions as well. Thereafter, the particle analysis function was  
354 used to isolate spherical cytosolic structures and report size distribution. Image groups were blinded for  
355 the analyzer during the quantification.

### 356 **Immunostaining**

357 Caco-2 cells on tissue culture dishes were rinsed with PBS (with Ca<sup>2+</sup> and Mg<sup>2+</sup>) three times, and fixed at  
358 room temperature in 2% paraformaldehyde/PBS (Electron Microscopy Sciences #RT-15710) for 15  
359 minutes. Cells were then washed once with PBS and residual paraformaldehyde was quenched using 1M  
360 glycine (Sigma #50046) in PBS for 10 minutes. Each of the following wash steps were carried out at room  
361 temperature for 5 minutes. After three washes using PBS, cells were further fixed/permeabilized using  
362 methanol/acetone solution (v/v:50/50) for exactly 2 minutes at room temperature. Cells were then  
363 sequentially washed three times with PBS, once with 0.5% Triton<sup>TM</sup>X-100 in PBS, and twice with 2%  
364 goat serum (Sigma #G9023) and 0.5% Triton<sup>TM</sup>X-100 in PBS. Primary antibodies including anti-ZO-1  
365 (Thermo #339188), anti-Claudin-2 (#ab53032), anti-Claudin-4 (Abcam #53156), anti-Claudin-10  
366 (Thermo #38-8400), anti-Rab5 (Abcam #ab18211) and anti-Ezrin (Abcam #ab4069) were used for  
367 specific immunostaining, and cells were stained for 1 hour at room temperature in PBS with 2% goat  
368 serum and antibody supplemented, followed by three washes using PBS with 2% goat serum. Cells were  
369 then stained with secondary antibodies including goat anti-mouse-Alexa Fluor 488 (Thermo #A11029)  
370 and goat anti-rabbit-Alexa Fluor 633 (Thermo #A21070) in PBS with 2% goat serum at room temperature  
371 for 1 hour. For F-actin staining after fixation, Alexa Fluor 488 Phalloidin was added into the secondary  
372 antibody staining mixture. Cells were washed three times with PBS followed by imaging using the  
373 spinning disk confocal microscope described above.

### 374 **Statistical analysis**

375 All data are expressed as the mean ± the standard deviation (SD). The value of n and what n represents  
376 (e.g., number of images, experimental replicates, or independent experiments) is stated in figure legends  
377 and results. Statistical analysis was performed in Prism 8 (GraphPad Inc.), and the statistical test used is  
378 indicated in the relevant figure legend.

379

### 380 **References**

381

- 382 1. E. Steed, M. S. Balda, K. Matter, Dynamics and functions of tight junctions. *Trends in cell biology*  
383 **20**, 142-149 (2010).
- 384 2. L. Shen, C. R. Weber, D. R. Raleigh, D. Yu, J. R. Turner, Tight junction pore and leak pathways:  
385 a dynamic duo. *Annual review of physiology* **73**, 283-309 (2011).
- 386 3. J. M. Anderson, C. M. Van Itallie, Physiology and function of the tight junction. *Cold Spring Harb*  
387 *Perspect Biol* **1**, a002584 (2009).
- 388 4. L. Shen, C. R. Weber, J. R. Turner, The tight junction protein complex undergoes rapid and  
389 continuous molecular remodeling at steady state. *The Journal of cell biology* **181**, 683-695 (2008).
- 390 5. M. A. Odenwald *et al.*, The scaffolding protein ZO-1 coordinates actomyosin and epithelial apical  
391 specializations in vitro and in vivo. *J Biol Chem* **293**, 17317-17335 (2018).
- 392 6. A. S. Fanning, B. J. Jameson, L. A. Jesaitis, J. M. Anderson, The tight junction protein ZO-1  
393 establishes a link between the transmembrane protein occludin and the actin cytoskeleton. *J Biol*  
394 *Chem* **273**, 29745-29753 (1998).

- 395 7. L. S. Rodgers, M. T. Beam, J. M. Anderson, A. S. Fanning, Epithelial barrier assembly requires  
396 coordinated activity of multiple domains of the tight junction protein ZO-1. *J Cell Sci* **126**, 1565-  
397 1575 (2013).
- 398 8. D. Yu *et al.*, MLCK-dependent exchange and actin binding region-dependent anchoring of ZO-1  
399 regulate tight junction barrier function. *Proceedings of the National Academy of Sciences of the*  
400 *United States of America* **107**, 8237-8241 (2010).
- 401 9. D. Spadaro *et al.*, Tension-Dependent Stretching Activates ZO-1 to Control the Junctional  
402 Localization of Its Interactors. *Curr Biol* **27**, 3783-3795 e3788 (2017).
- 403 10. C. B. Fox *et al.*, Micro/nanofabricated platforms for oral drug delivery. *J Control Release* **219**,  
404 431-444 (2015).
- 405 11. L. V. Le, M. A. Mkrtchjan, B. Russell, T. A. Desai, Hang on tight: reprogramming the cell with  
406 microstructural cues. *Biomed Microdevices* **21**, 43 (2019).
- 407 12. K. R. Kam *et al.*, Nanostructure-mediated transport of biologics across epithelial tissue: enhancing  
408 permeability via nanotopography. *Nano Lett* **13**, 164-171 (2013).
- 409 13. L. Walsh *et al.*, Nanotopography facilitates in vivo transdermal delivery of high molecular weight  
410 therapeutics through an integrin-dependent mechanism. *Nano letters* **15**, 2434-2441 (2015).
- 411 14. T. Stewart *et al.*, Calibrated flux measurements reveal a nanostructure-stimulated transcytotic  
412 pathway. *Exp Cell Res* **355**, 153-161 (2017).
- 413 15. M. S. Balda *et al.*, Functional dissociation of paracellular permeability and transepithelial electrical  
414 resistance and disruption of the apical-basolateral intramembrane diffusion barrier by expression  
415 of a mutant tight junction membrane protein. *The Journal of cell biology* **134**, 1031-1049 (1996).
- 416 16. B. Srinivasan *et al.*, TEER measurement techniques for in vitro barrier model systems. *J Lab*  
417 *Autom* **20**, 107-126 (2015).
- 418 17. K. M. McCarthy *et al.*, Inducible expression of claudin-1-myc but not occludin-VSV-G results in  
419 aberrant tight junction strand formation in MDCK cells. *Journal of cell science* **113 Pt 19**, 3387-  
420 3398. (2000).
- 421 18. A. L. Mattheyses, S. M. Simon, J. Z. Rappoport, Imaging with total internal reflection fluorescence  
422 microscopy for the cell biologist. *J Cell Sci* **123**, 3621-3628 (2010).
- 423 19. O. Beutel, R. Maraspini, K. Pombo-Garcia, C. Martin-Lemaitre, A. Honigmann, Phase Separation  
424 of Zonula Occludens Proteins Drives Formation of Tight Junctions. *Cell* **179**, 923-936 e911  
425 (2019).
- 426 20. C. Schwayer *et al.*, Mechanosensation of Tight Junctions Depends on ZO-1 Phase Separation and  
427 Flow. *Cell* **179**, 937-952 e918 (2019).
- 428 21. F. K. Riesen, B. Rothen-Rutishauser, H. Wunderli-Allenspach, A ZO1-GFP fusion protein to study  
429 the dynamics of tight junctions in living cells. *Histochem Cell Biol* **117**, 307-315 (2002).
- 430 22. J. M. Brazill, Y. Zhu, C. Li, R. G. Zhai, Quantitative Cell Biology of Neurodegeneration in  
431 *Drosophila* Through Unbiased Analysis of Fluorescently Tagged Proteins Using ImageJ. *Jove-J*  
432 *Vis Exp*, (2018).
- 433 23. L. A. Mitchell, C. E. Overgaard, C. Ward, S. S. Margulies, M. Koval, Differential effects of  
434 claudin-3 and claudin-4 on alveolar epithelial barrier function. *American journal of physiology*  
435 **301**, L40-49 (2011).
- 436 24. F. C. Tsai *et al.*, Ezrin enrichment on curved membranes requires a specific conformation or  
437 interaction with a curvature-sensitive partner. *Elife* **7**, (2018).

438

## 439 Acknowledgments

440

441 **General:** We thank K. Herrington for advice on cell imaging. **Funding:** this research was supported by  
442 the National Institute of Health grant 1R01EB018842 to T.A.D. and M.K. X.H. was supported by a Li  
443 foundation fellowship. X.S. was supported by the NIH Pathway to Independence Award 1K99GM126136.  
444 B.H. is a Chan Zuckerberg Biohub Investigator. **Author contributions:** X.H., X.S., M.K., T.A.D designed  
445 the research. X.H. carried out the experiments. X.H. and M.E.H analyzed the data. X.H., X.S., A.C., T.M.,  
446 M.K. and T.A.D interpreted the results. X.H. drafted the manuscript. X.H., M.K., X.S., C.N., B.H., T.M.  
447 and T.A.D. edited the manuscript. **Competing interests:** the authors declare no competing interest. **Data**  
448 **and materials availability:** All data needed to evaluate the conclusions in the paper are present in the  
449 paper and/or the Supplementary Materials. Additional data related to this paper may be requested from  
450 the authors.

451

452

453 **Figures**

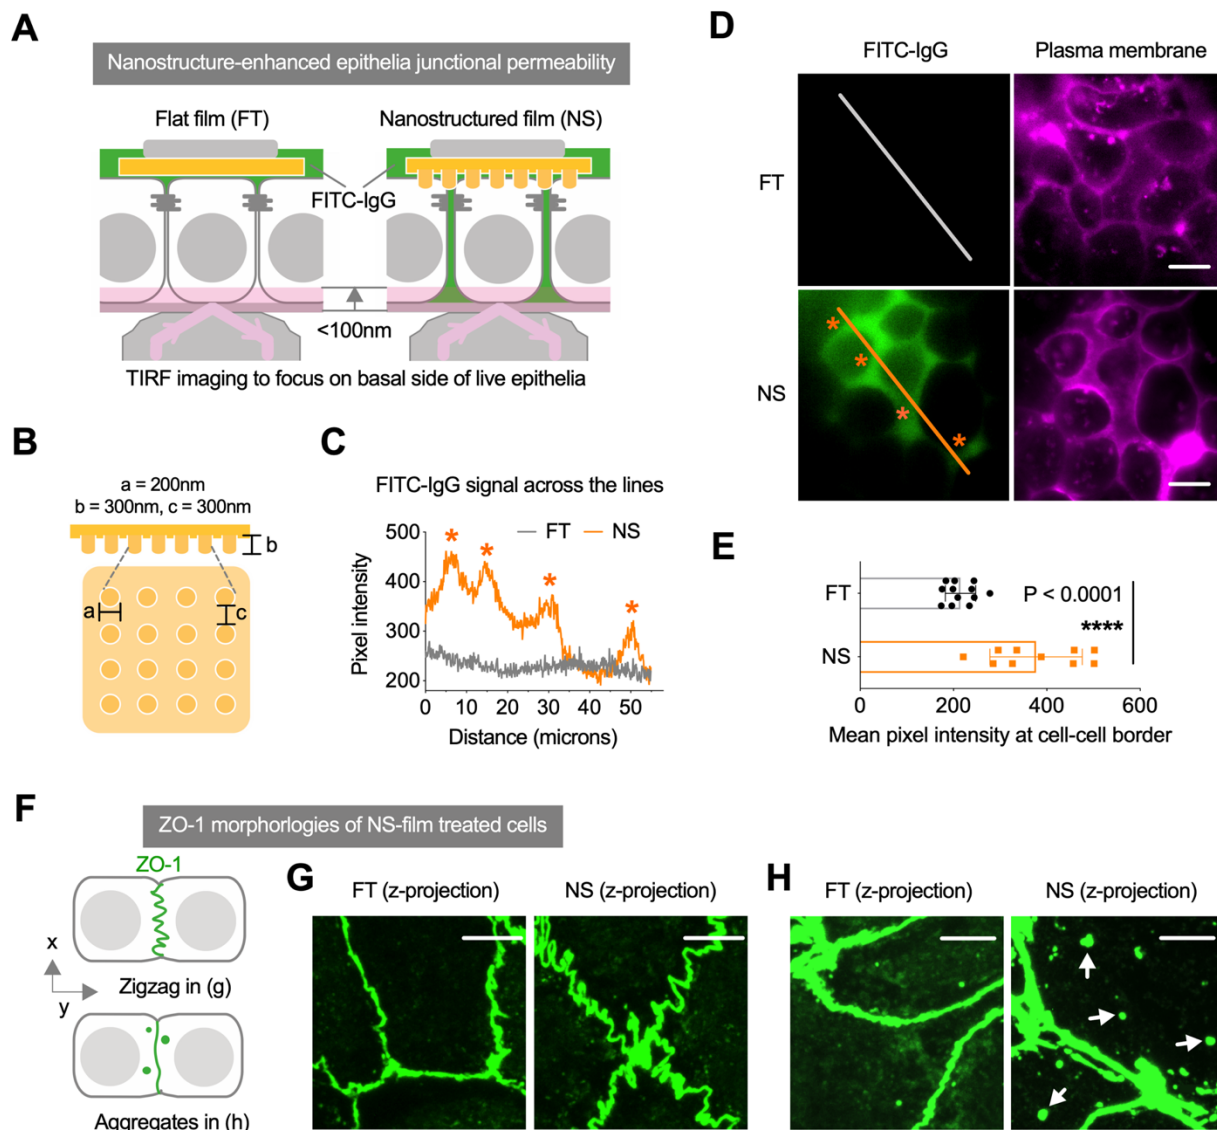

454  
455

456 **Fig. 1. Enhanced permeability of epithelial monolayer barriers through paracellular junctions**  
 457 **induced by contact with nanotopographic surfaces.** (A) Schematic of live epithelial cell basal imaging  
 458 using total internal reflection fluorescence (TIRF) microscopy to track penetration of fluorescently labeled  
 459 IgG. (B) Schematic of topographic profile of nanoimprinted polypropylene film generated from molds  
 460 using electron-beam lithography. (C) TIRF images of the basal aspect of live Caco-2 monolayers treated  
 461 with flat (FT) or nanostructured (NS) films together with FITC-labeled IgG (green) applied to the apical  
 462 side for 1 hour at 37°C (from n = 3 independent experiments). The pattern of FITC-IgG accumulation at  
 463 the basal side of cells treated with NS films correlated well with basolateral gaps as delineated by cell  
 464 membrane staining (pink), indicating paracellular permeability. Scale bar: 10 μm. (D) Transverse profile  
 465 of FITC-IgG as indicated by the lines in (C), showing the accumulation of FITC-IgG at basolateral gaps  
 466 due to NS film treatment. (E) Mean fluorescence intensity of FITC-IgG at below cell-cell contact sites in  
 467 (C). Data are mean ± s.d. (n = 10 images), and the P value was determined by two-tailed unpaired t test.  
 468 (F) Schematic of ZO-1 morphological changes due to direct contact with NS films. (G,H) Confocal



469 microscope images of immunostained ZO-1 in Caco-2 cells treated with NS or FT film for 1 hour at 37°C,  
470 showing zigzag and aggregate morphologies (white arrows) induced by nanostructures. Images are  
471 projections of maximum pixel intensity of z-stack images acquired with 6 μm depth and 0.3 μm intervals.  
472 Scale bar: 5 μm.

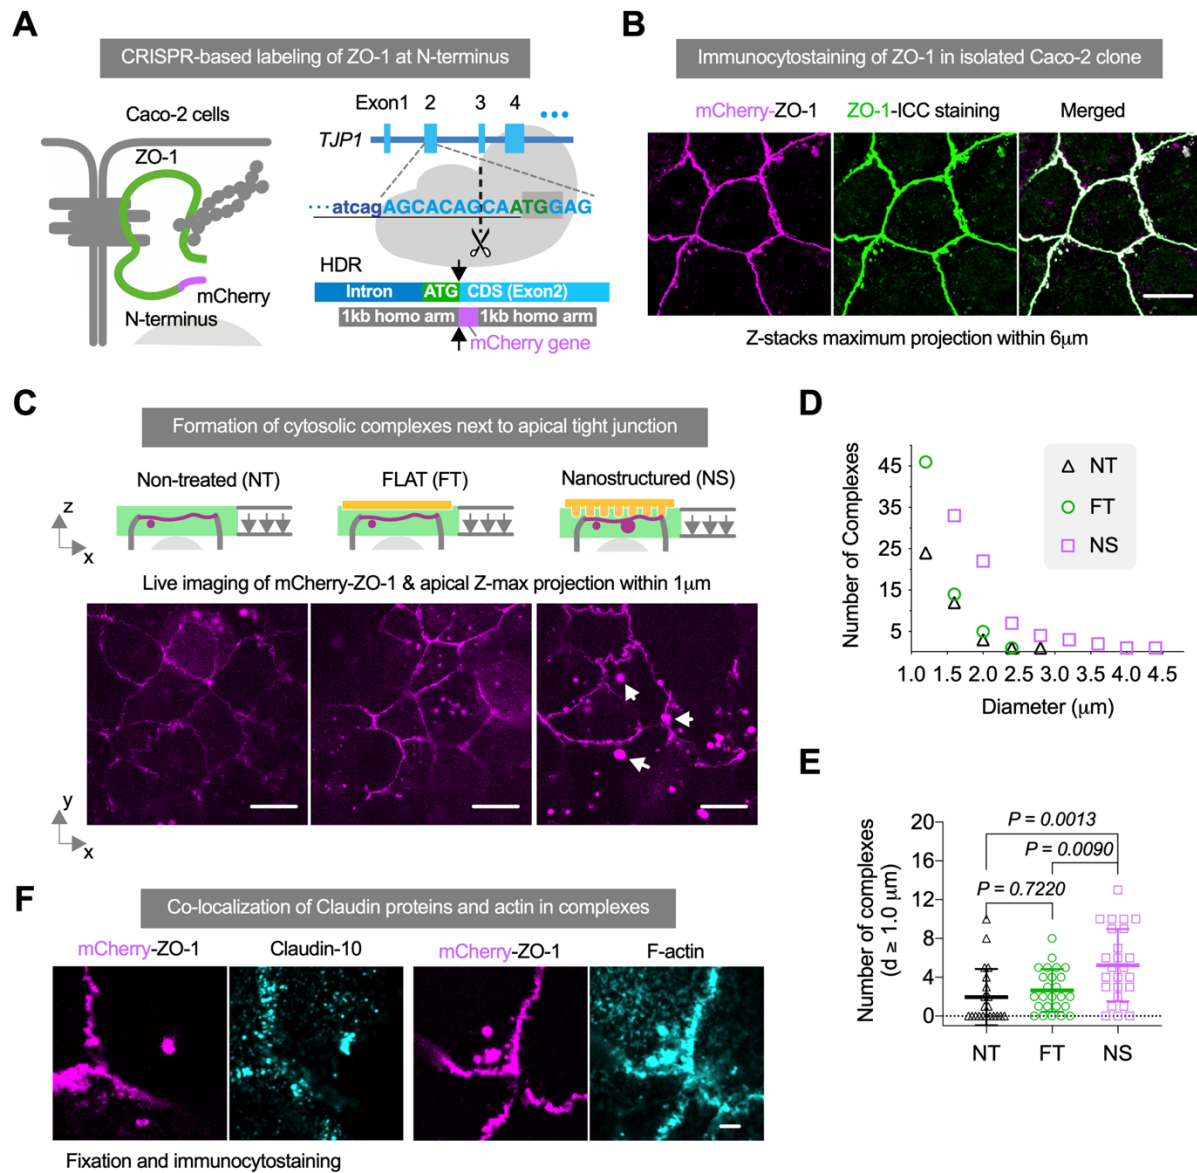

473  
474

475 **Fig. 2. Cytosolic complexes of ZO-1 induced by nanostructures, which also contain claudin-family**  
 476 **transmembrane proteins.** (A) Schematic of CRISPR-based tagging of mCherry reporter to the ZO-1 N-  
 477 terminus under control of the endogenous promoter. The *mCherry* gene was inserted into exon2 of *TJP1*  
 478 gene through homology-directed repair (HDR). (B) Co-localization of mCherry and immunostained (ICC)  
 479 ZO-1 in a selected Caco-2 clone validated the fidelity of tagged-ZO-1 for live cell tracking. Images are  
 480 projections of maximum pixel intensity of apical z-stack images acquired with 1 μm depth and 0.3 μm  
 481 intervals. Scale bar: 10 μm. (C) Images of apical mCherry-ZO-1 in live Caco-2 monolayer cultures in  
 482 contact with nanostructured (NS) or flat (FT) polypropylene films for 0.5-1.5 hours at 37°C, and non-  
 483 treated (NT) control. Cytosolic complexes larger than 1.0 μm diameter (white arrows) appeared at the  
 484 apical side of cells in contact with a NS films. Images are projections of maximum pixel intensity of apical  
 485 z-stack images acquired with 1 μm depth and 0.3 μm intervals. Scale bar: 10 μm. (D) Size distribution of  
 486 apical cytosolic complexes ( $d \geq 1.0 \mu\text{m}$ ) in images represented in (C). (E) Number of ( $d \geq 1.0 \mu\text{m}$ )  
 487 complexes of each image in (C). Data are mean  $\pm$  s.d. ( $n = 25$  images for each treatment, from 5

488 independent experiments), and *P* values were determined by one-way ANOVA. (F) Immunostained  
489 images of mCherry-ZO-1 engineered Caco-2 cells after treatment with NS film at 37°C for 1 hour show  
490 co-localization of Claudin-10 and F-actin in cytosolic mCherry-ZO-1 complexes. Scale bar: 2 μm.  
491

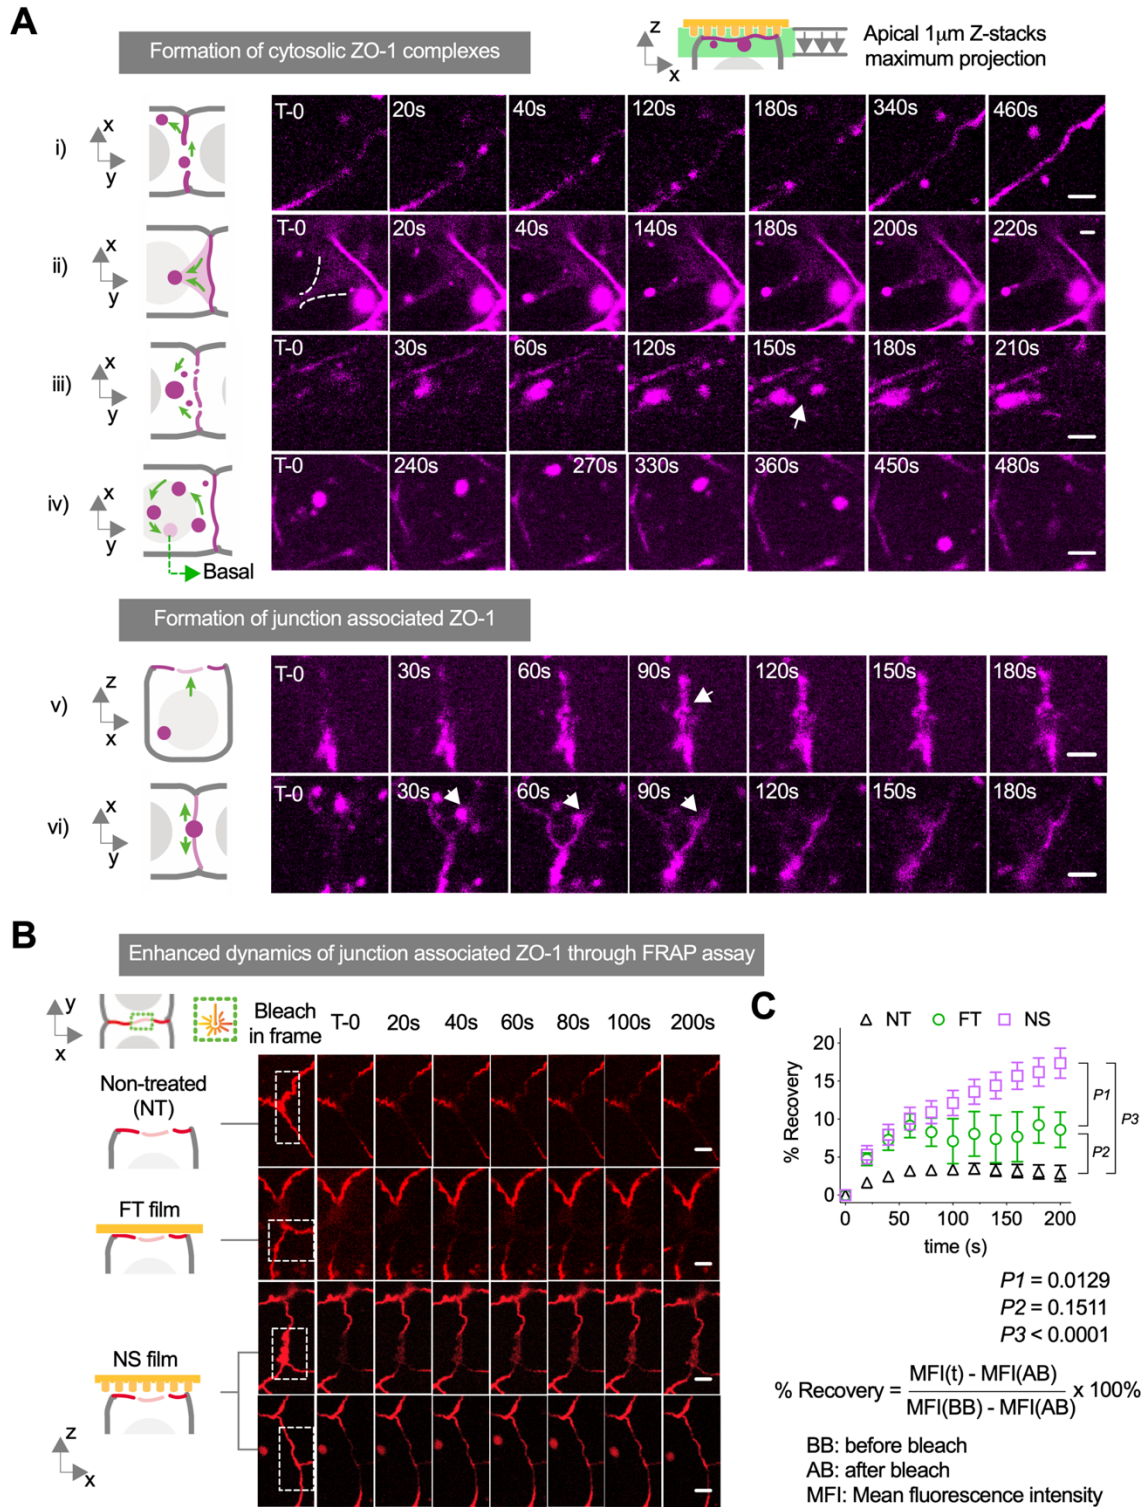

492  
493  
494  
495  
496  
497

**Fig. 3. Enhanced dynamics of junction-associated ZO-1 in engineered Caco-2 cells in contact with nanostructured film.** (A) Time-lapse images of mCherry-tagged ZO-1 at the apical side of the cells stimulated by nanotopographic cues for 0.5-1.5 hour at 37°C. Means of cytosolic complexes formation included: i) junction-associated ZO-1 proteins aggregate and dissociate from the original structure into the cytosol; ii) cytosolic ZO-1 proteins cluster into puncta within a network (highlighted by white dashed line)



498 next to junctions; iii) cytosolic structures merge with newly restructured ZO-1; iv) apical cytosolic  
499 complex circulates while collecting smaller ZO-1 structures which then moves basolaterally. Junction-  
500 like ZO-1 structure formed through v) rapid reorganization likely originated from basolateral side; and vi)  
501 direct transformation of cytosolic ZO-1 complex (white arrow). Images are projections of maximum pixel  
502 intensity of apical z-stack images acquired with 1  $\mu\text{m}$  depth and 0.3  $\mu\text{m}$  intervals. Scale bar: 2  $\mu\text{m}$ . **(B)**  
503 Time-lapse images of junction-associated mCherry-ZO-1 after photobleaching at a selected region (white  
504 dashed line) in response to contact with either a flat (FT) or nanostructured (NS) film for 0.5-1.5 hour or  
505 that were non-treated (NT). Scale bar: 2  $\mu\text{m}$ . **(C)** Quantification of fluorescence recovery after  
506 photobleaching (FRAP) in selected frames represented in (B). Data are mean  $\pm$  s.d. (analyzed from 26  
507 images for NT, 11 images for FT, and 29 images for NS, pooled from 2 independent experiments), and *P*  
508 values were determined by one-way ANOVA analysis of recovery at 200 s.

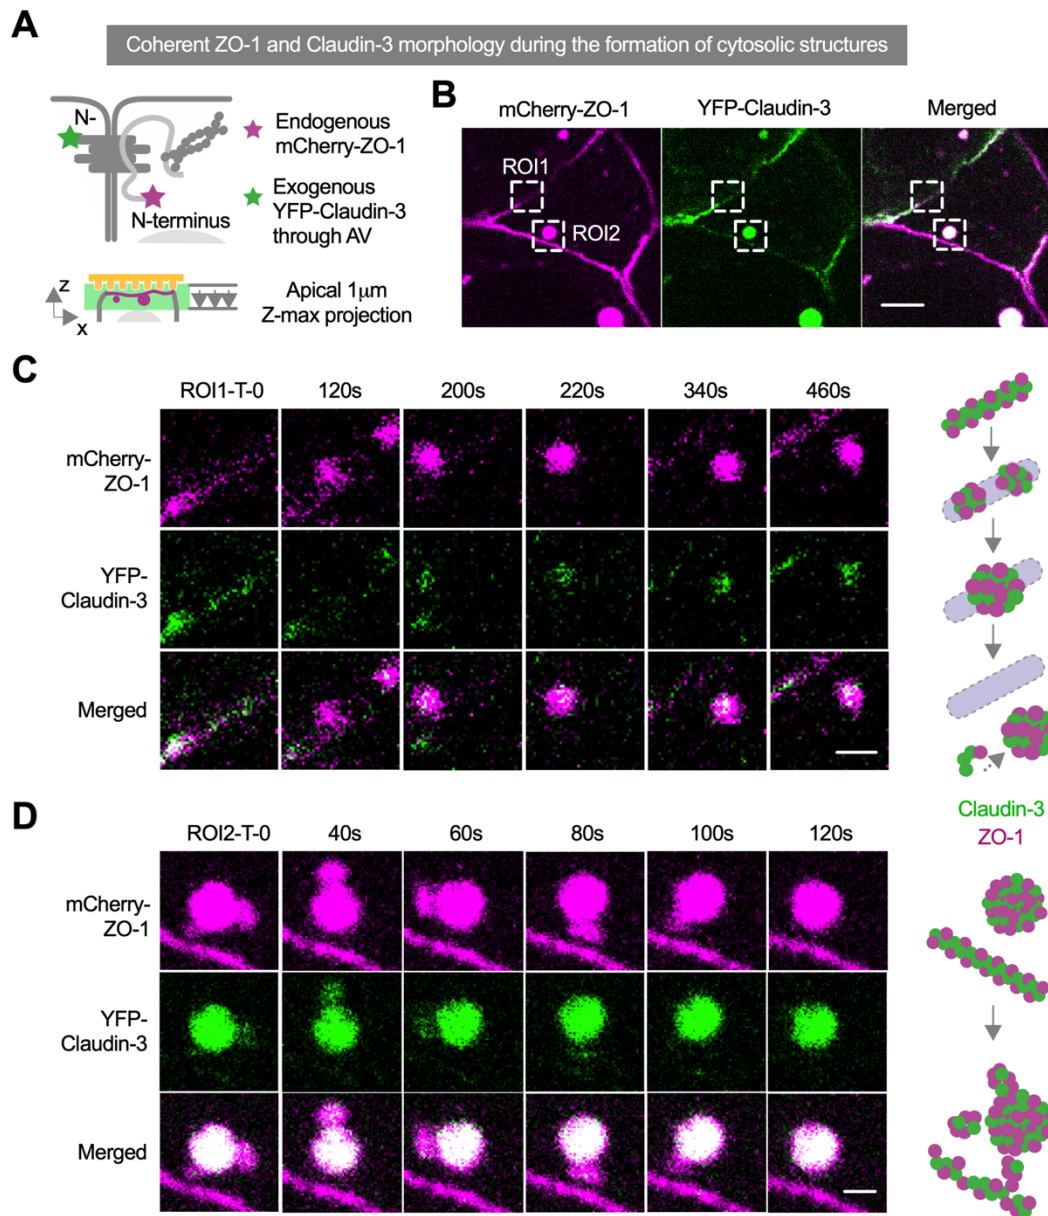

509  
510

511 **Fig. 4. Co-transport of ZO-1 and claudins during the initiation and formation of cytosolic complexes**  
 512 **after nanotopographic contact.** (A) Schematic of exogenous YFP-claudin3 adenovirus transduction in  
 513 mCherry-ZO-1 engineered Caco-2 cells for live imaging analysis. Images of each time lapse were acquired  
 514 at apical 1  $\mu\text{m}$  depth with 0.3  $\mu\text{m}$  intervals and projected the maximum pixel intensity into presented  
 515 images. (B) Images of mCherry ZO-1 and YFP-claudin-3 co-expressing Caco-2 cells treated with a  
 516 nanostructured film at 37°C for 0.5-1.5 hour, showing co-localization of ZO-1 and claudin-3 in apical  
 517 cytosolic complexes. Scale bar: 10  $\mu\text{m}$ . (C) Time-lapse images of ROI1 in (B) show the involvement of  
 518 both ZO-1 and claudin-3 in the initiation of complex formation and cytosolic migration. (D) Time-lapse  
 519 images of ROI2 in (B) show formation of apical cytosolic complexes containing both ZO-1 and claudin-  
 520 3 originating from a neighboring tight junction. Scale bar: 2  $\mu\text{m}$ .

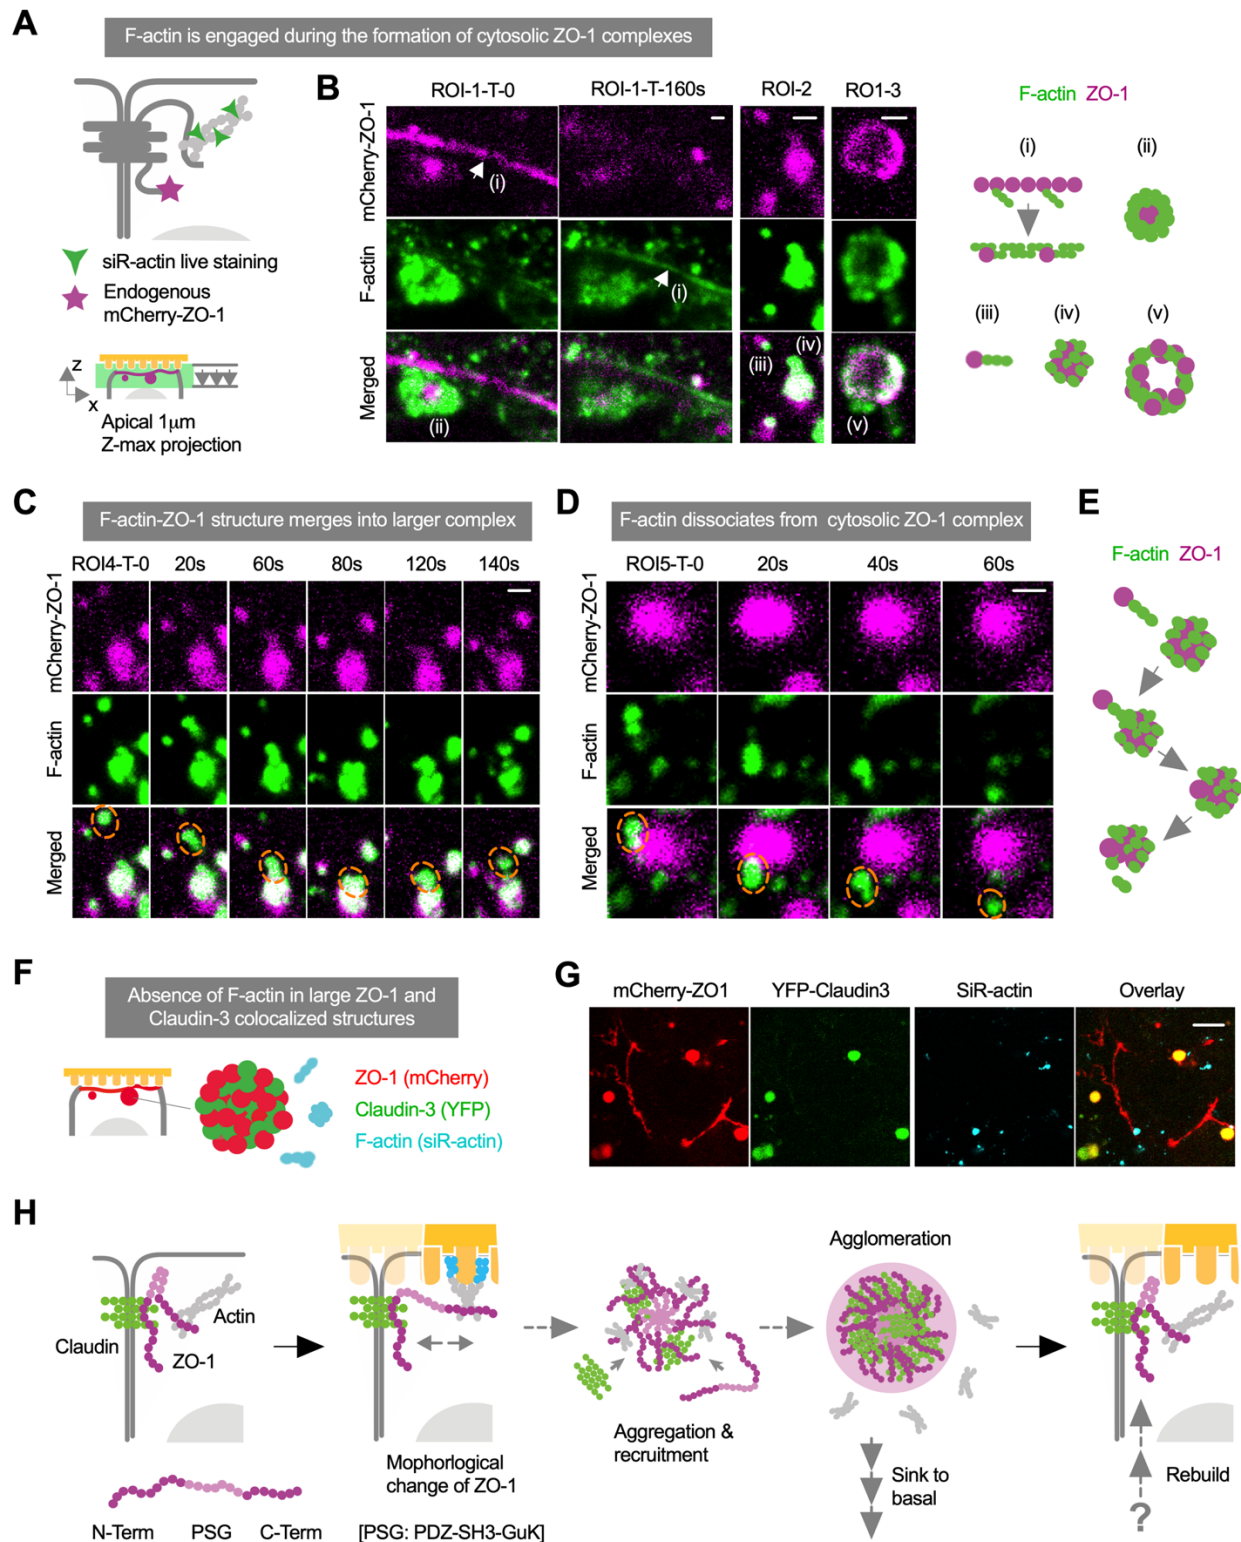

521  
522  
523  
524

**Fig. 5. Nanotopographic modulation engages F-actin in the formation of ZO-1 cytosolic complexes.** (A) Schematic of F-actin staining in mCherry-ZO-1 engineered Caco-2 cells for live imaging analysis.

525 Images of each time lapse are acquired at apical 1  $\mu\text{m}$  depth with 0.3  $\mu\text{m}$  intervals and projected the  
526 maximum pixel intensity into presented images. **(B)** Images of cells stimulated by nanotopographic cues  
527 for 0.5-1.5 hour at 37°C show different patterns of F-actin/ZO-1 interactions: i) disappearance of ZO-1  
528 concomitant with the appearance of F-actin at tight junctions; ii) F-actin wrapped around ZO-1 in cytosolic  
529 complexes next to a tight junction; iii) polarized cytosolic F-actin-ZO-1 complexes with F-actin facing  
530 toward iv) a larger solid integrated structure; and v) organization of F-actin and ZO-1 into large (>2  $\mu\text{m}$   
531 diameter) hollow structures. Scale bar: 2  $\mu\text{m}$ . **(C)** Time-lapse images show merging of the F-actin-ZO-1  
532 structure (orange dashed line) into a larger complex containing the two proteins. Scale bar: 2  $\mu\text{m}$ . **(D)**  
533 Time-lapse images show dissociation of F-actin from cytosolic ZO-1 complex. Scale bar: 2  $\mu\text{m}$ . **(E)**  
534 Summary schematic of F-actin associated dynamics involved in formation of cytosolic ZO-1 complexes.  
535 **(F)** Schematic of mCherry-ZO-1, YFP-claudin-3 and F-actin interactions in engineered Caco-2 cells for  
536 live imaging analysis. **(G)** Images of live cells that are stimulated by nanotopographic cues for 72 mins at  
537 37°C show co-localization of ZO-1 and claudin-3 but not F-actin in apical cytosolic complexes. Scale bar:  
538 10  $\mu\text{m}$ . **(H)** Proposed mechanism of tight junction remodeling in response to nanotopographic cues  
539 involving ZO-1 cytosolic complexes.  
540



## Supplementary Materials

### **Title: Nanotopography enhances dynamic remodeling of tight junction proteins through cytosolic complexes**

**Authors:** Xiao Huang<sup>1</sup>, Xiaoyu Shi<sup>2,3</sup>, Mollie Eva Hansen<sup>4</sup>, Cameron L. Nemeth<sup>4</sup>, Anna Ceili<sup>5</sup>, Bo Huang<sup>2,6,7</sup>, Theodora Mauro<sup>5</sup>, Michael Koval<sup>8</sup>, and Tejal A. Desai<sup>1,4\*</sup>

#### **Affiliations:**

<sup>1</sup> Department of Bioengineering and Therapeutic Sciences, University of California, San Francisco, San Francisco, California, USA

<sup>2</sup> Department of Pharmaceutical Chemistry, University of California, San Francisco, San Francisco, California, USA

<sup>3</sup> Department of Developmental and Cell Biology, University of California, Irvine, Irvine, California, USA

<sup>4</sup> UC Berkeley-UCSF Graduate Program in Bioengineering, University of California, San Francisco, San Francisco, California, USA

<sup>5</sup> Department of Dermatology, University of California, San Francisco, San Francisco, California, USA

<sup>6</sup> Department of Biochemistry and Biophysics, University of California, San Francisco, San Francisco, California, USA

<sup>7</sup> Chan Zuckerberg Biohub, San Francisco, California, USA

<sup>8</sup> Division of Pulmonary, Allergy, and Critical Care Medicine and Department of Cell Biology, Emory University School of Medicine, Atlanta, Georgia, USA

\*Correspondence to: Tejal A. Desai, PhD (email: [tejal.desai@ucsf.edu](mailto:tejal.desai@ucsf.edu))

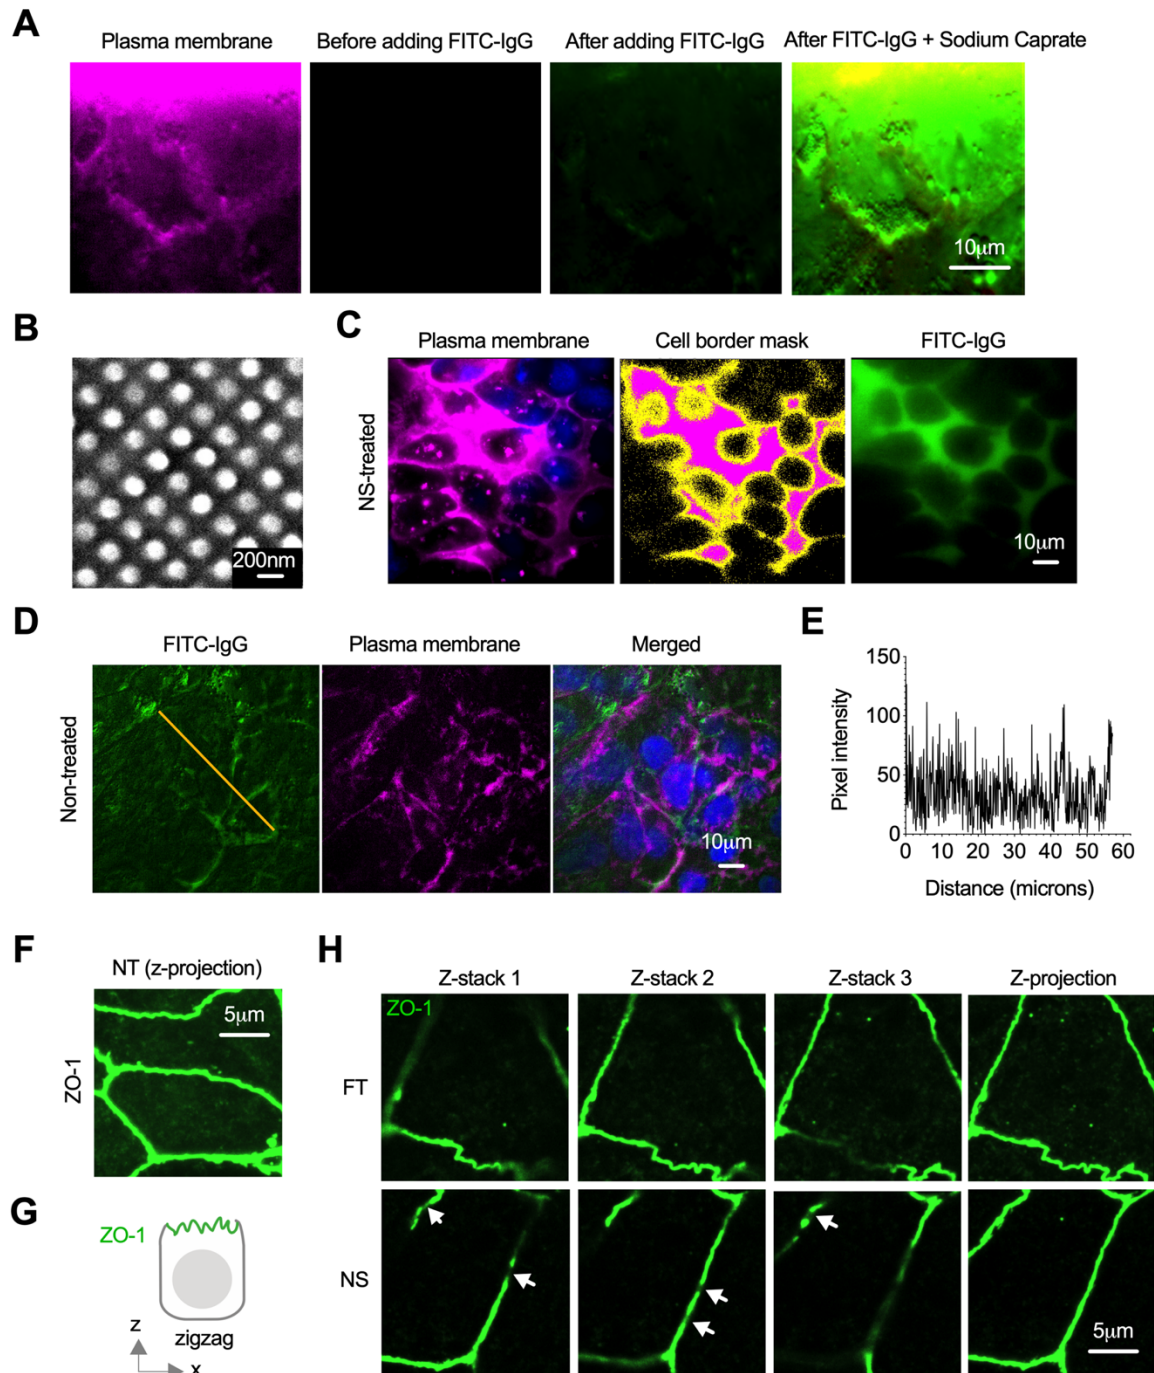

**Fig. S1. Enhanced leakiness of biomolecules through paracellular junctions with nanotopographic film treatment.** (A) TIRF images of basal side of live Caco-2 monolayer treated with FITC-labeled IgG and sodium caprate, showing polarized epithelial monolayer with paracellular barriers blocking the penetration of macromolecules from apical side to basal side. Adding sodium caprate at 1 mM irreversibly opened tight junctions and led to immediate penetration of FITC-IgG through the monolayer to be detected by TIRF imaging at the basal side. (B) Scanning electron microscopy (SEM) image of nanostructured polypropylene film. (C) Images

of cell-cell border area mask generation from plasma membrane staining, which is used for quantification and normalization of FITC-IgG signal accumulation. **(D)** TIRF images of basal membrane of live epithelial cell Caco-2 monolayer treated with FITC-labeled IgG for 1 hour at 37°C (from  $n = 3$  independent experiments). **(E)** Transverse profile of FITC-IgG as indicated by the lines in (D). Signal intensity and distribution in FITC-IgG channel is not comparable to the conditions where the flat/nanostructured film are in direct contact with cells (Fig. 1c) due to the reflection effect of the film during TIRF imaging. **(F)** Image of immunostained ZO-1 in non-treated Caco-2 cells, as compared to Fig. 1g&h. **(G)** Schematic of ZO-1 zigzag morphology at  $xz/yz$  focal plane of Caco-2 cells in direct contact with nanostructured film. **(H)** Images of immunostained ZO-1 in Caco-2 cells treated with NS or FT film for 1 hour at 37°C show zigzag morphology at  $xz/yz$  focal plane. Z-projection images are projections of maximum pixel intensity of z-stack images acquired with 6  $\mu\text{m}$  depth and 0.3  $\mu\text{m}$  intervals.

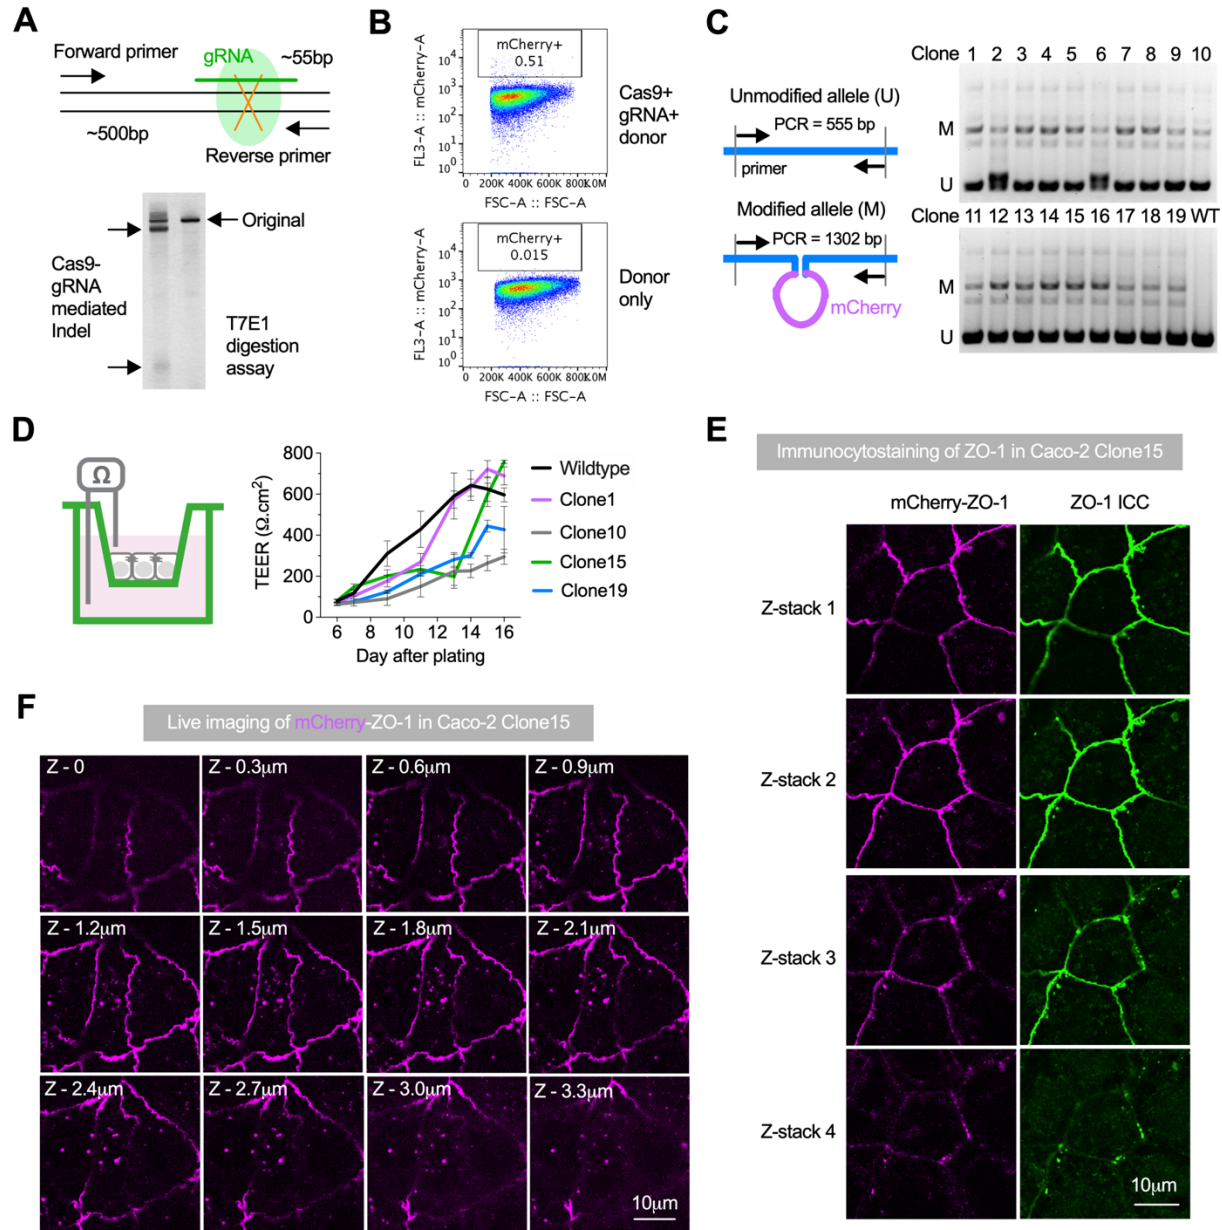

**Fig. S2. Tagging of endogenous ZO-1 with mCherry reporter in Caco-2 cells through CRISPR-based genome editing and its phenotypic confirmations.** (A) T7E1 digestion assay and agarose gel electrophoresis to detect Cas9-gRNA mediated insertion/deletion (indel) of targeted *TJP1* gene. (B) FACS sorting of CRISPR-transduced Caco-2 cells to enrich mCherry positive population (in frame). Top panel: forward scattering and mCherry signal plot of cells co-transfected with Cas9, gRNA and donor template DNA after 14 days; bottom panel: forward scattering and mCherry signal plot of un-transfected control cells. (C) Genomic PCR and agarose gel electrophoresis of purified clones to confirm the insertion of mCherry gene at intended loci. All of the isolated clones have heterozygous modification of ZO-1. (D) Validation of barrier formation potency of engineered Caco-2 clones through transepithelial electrical resistance (TEER) measurements of cells cultured on transwell inserts. Clone15 with optimal accumulation

of TEER values was selected for imaging analysis. Data are mean  $\pm$  s.d. (n = 3 biological replicates). **(E)** Co-localization of mCherry and immunocytostaining (ICC) of ZO-1 in Caco-2 Clone15 at different Z-stacks. **(F)** Z-stack scanning of live Caco-2 Clone15 by confocal microscopy reveals cytosolic structures of ZO-1 at basal-lateral locations underneath tight junctions.



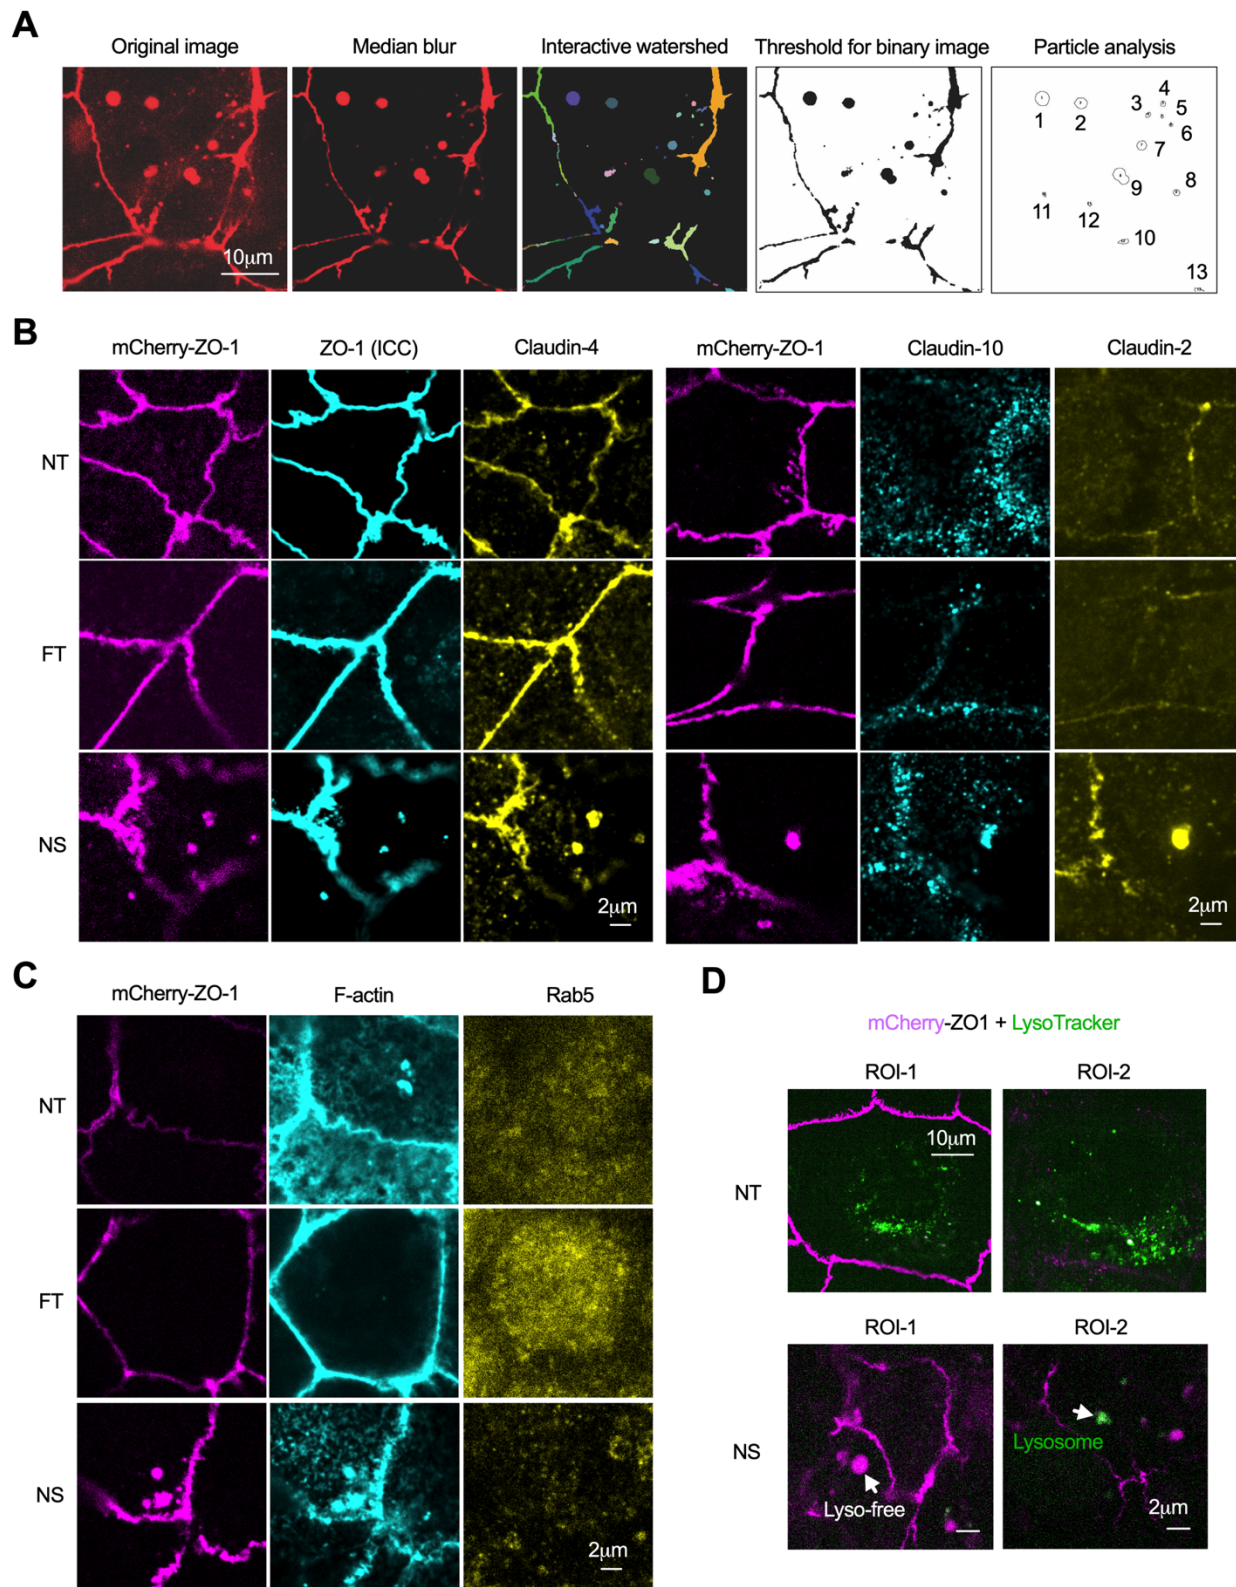

**Fig. S3. Quantification and compositional identification of cytosolic ZO-1 complexes formed upon nanostructured film treatment. (A) Processing and quantification of cytosolic complexes**

in images of engineered Caco-2 cell apical locations. Images were individually processed through median blur, interactive watershed, threshold for binary image and particle analysis. Size distribution of spherical complexes in images were reported in Fig. 2d,e. **(B,C)** Immunostained images of mCherry-ZO-1 engineered Caco-2 cells after treatment with NS film at 37°C for 1 hour showed co-localization of Claudin-2, Claudin-4, Claudin-10 (B) and F-actin (C) in cytosolic mCherry-ZO-1 complexes, while Rab5 was absent (C). **(D)** Images of LysoTracker dye stained live Caco-2 cells that were non-treated (NT) or in contact with NS film for 0.5-1.5 hour at 37°C showing that the apical cytosolic complexes are non-acidic. Scale bar: 2  $\mu$ m.



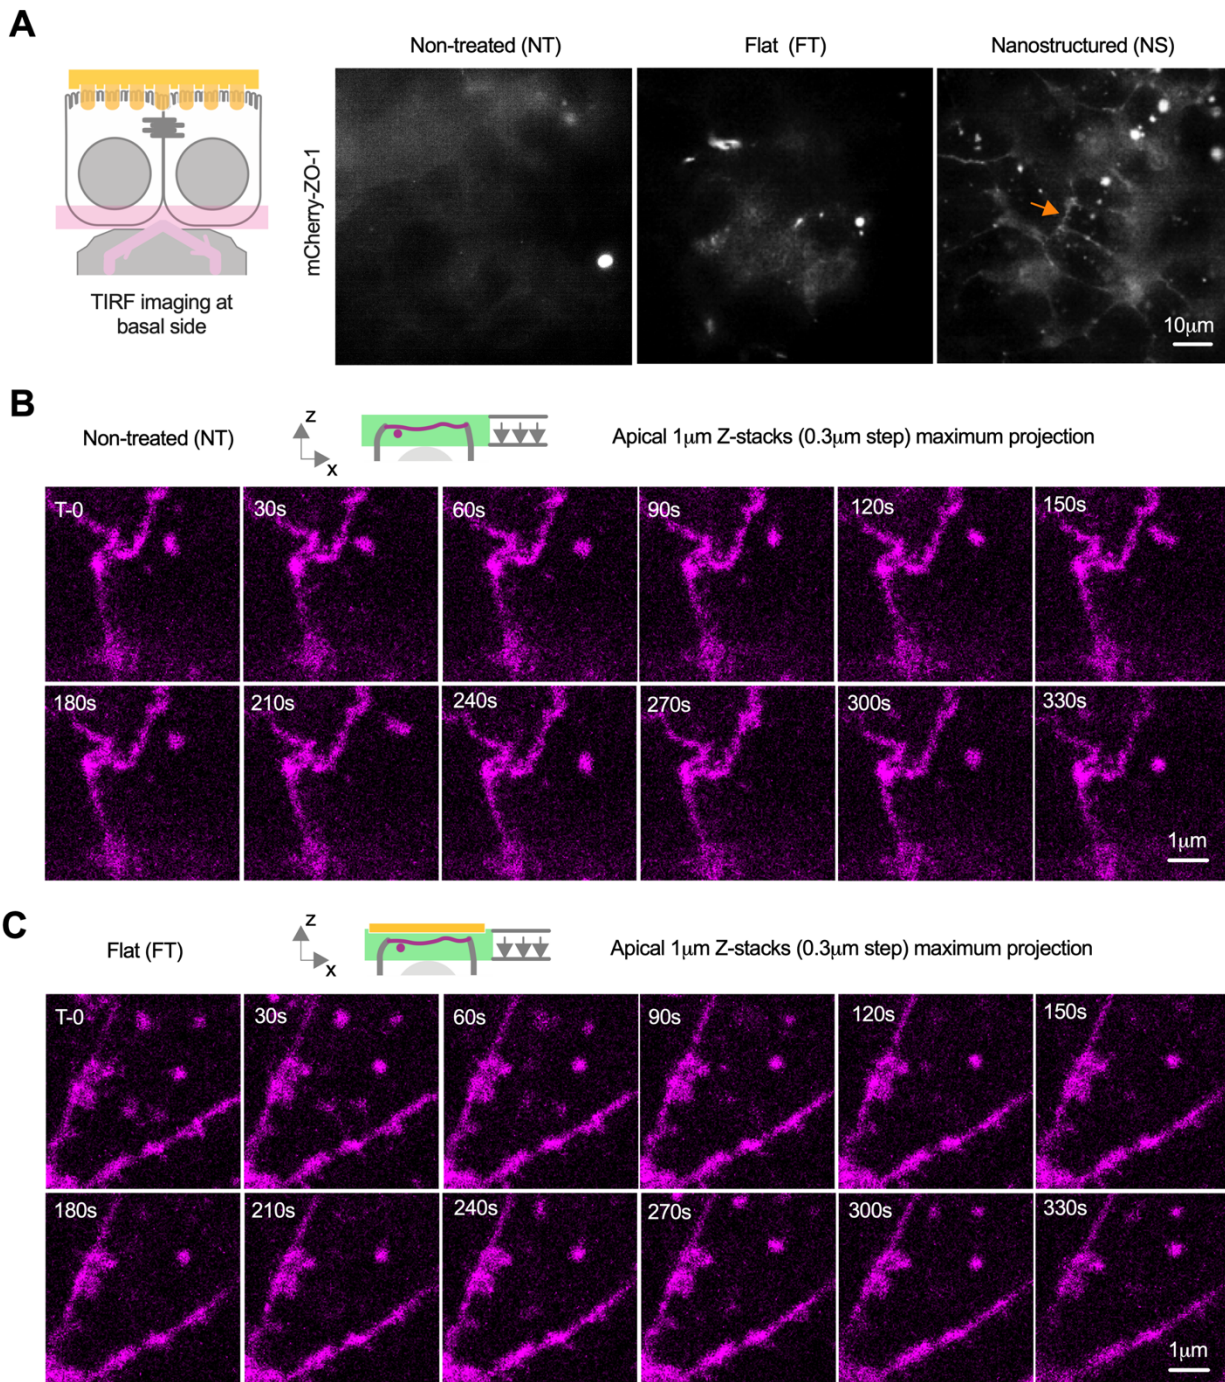

**Fig. S4. Live imaging of engineered mCherry-ZO1 cells at apical and basal side upon different treatment.** (A) TIRF images at the basal side of engineered Caco-2 cells that were non-treated, or treated with flat or nanostructured film at the apical side for 1 hour at 37°C, showed interesting junction-like morphology (orange arrow) of mCherry-ZO-1 in cells stimulated by nanotopography. (B,C) Time lapse of apical mCherry-tagged ZO-1 in non-treated (NT) Caco-2 cells and those treated with flat film (FT) for 0.5-1.5 hour at 37°C. Fewer and smaller cytosolic structures of ZO-1 at apical side were observed in NT (B) or FT (C)-treated cells, and the

interaction between tight junction and cytosolic structure was minimal. Images are projections of maximum pixel intensity of apical z-stack images acquired with 1  $\mu\text{m}$  depth and 0.3  $\mu\text{m}$  intervals.

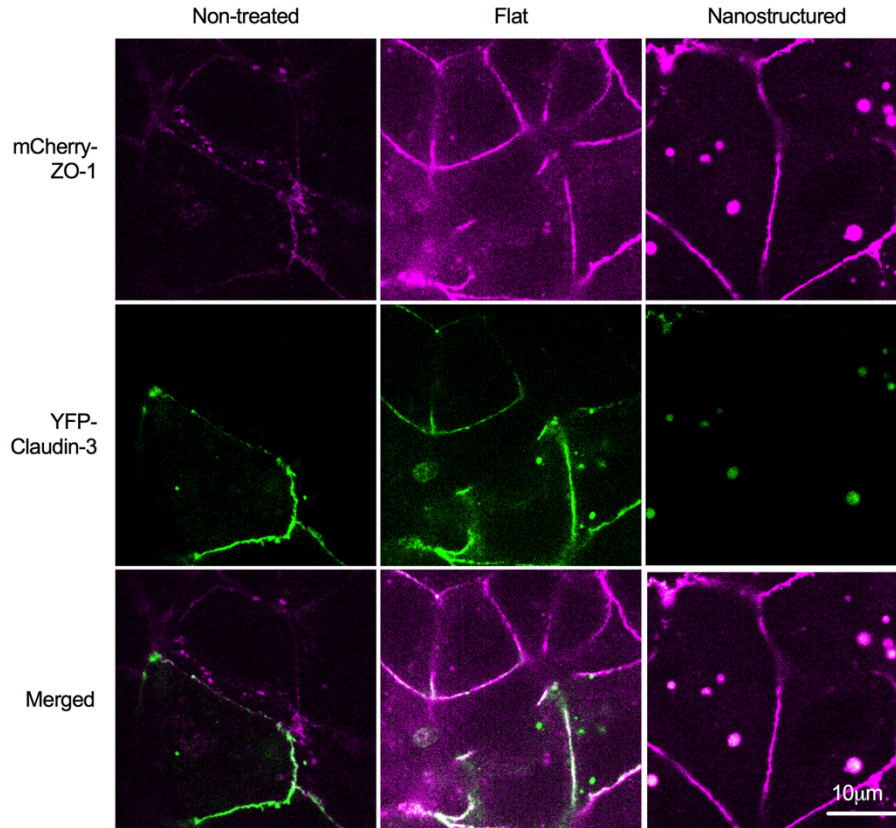

**Fig. S5. Live imaging of engineered mCherry-ZO1 cells that are exogenously transfected with YFP-Claudin-3, in response to flat and nanostructured film in comparison with untreated control.** Adenovirus transfection of Caco-2 cells was controlled at 100 MOI (multiplicity of infection) to minimize unnatural accumulation of cytosolic Claudin-3, while tolerating uneven expression level among cells. Nanotopographic treatment led to apical cytosolic complexes that contain both ZO-1 and Claudin-3; however, in untreated or flat film treated cells, smaller and fewer cytosolic structures did not contain both proteins.



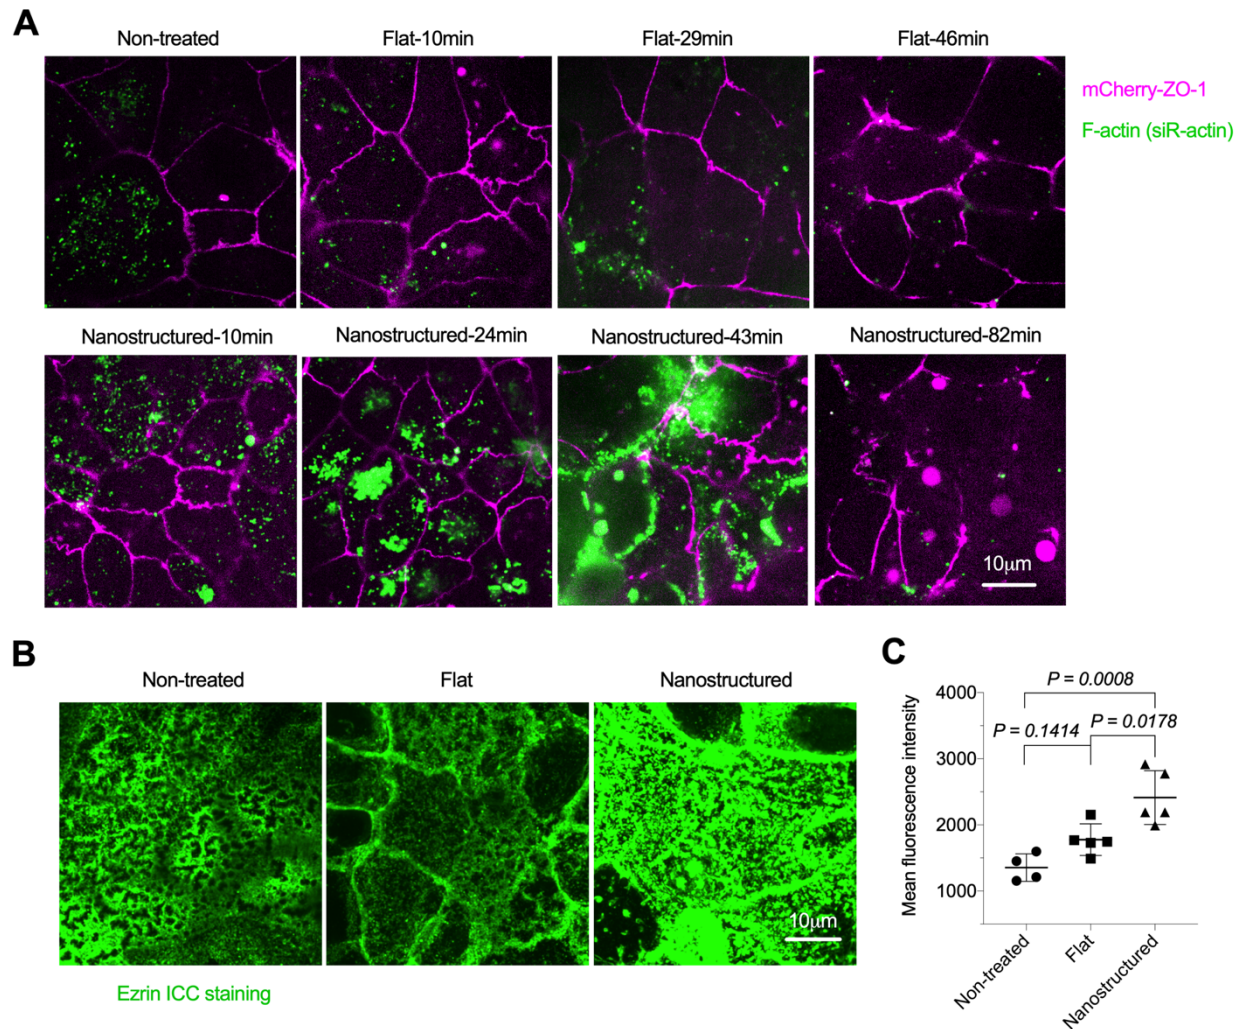

**Fig. S6. F-actin clusters and remodels at apical side upon nanostructured film treatment, while ezrin protein, a connector between cell membrane protein and actin, was up-regulated as well. (A)** Images of F-actin stained live mCherry-ZO-1 cells at different time point after flat and nanostructured film treatment. Apparent clustering and remodeling of F-actin in live cell apical side was observed from nanostructured film treatment; however, this trend was less obvious from flat film treatment and even less for non-treated cells. Images are projections of maximum pixel intensity of apical z-stack images acquired with 1 µm depth and 0.3 µm intervals. **(B)** Images of ezrin staining of Caco-2 cells treated with flat and nanostructured film for 1 hour at 37°C, compared with non-treated control. Images are projections of maximum pixel intensity of apical z-stack images acquired with 6 µm depth and 0.3 µm intervals. **(C)** Quantification of mean pixel intensity in images shown in (B). Data are mean ± s.d. (n = 5 images), and P values were determined by one-way ANOVA analysis.

## Note S1. Sequence of repair plasmid for HDR-based mCherry knock-in.

The following 2747bp gene was cloned in pUC57-Kan plasmid by EcoRV (Genscript, Inc).

```
aggagatcgagaccatcccggctaaaacggtgaaaccccgtctgtactaaaaatacaaaaaattagccggcgtagtggcggcgctgtagtccca
gctacttgggaggctgaggcaggagaatggcgtgaacccgggaggcggagcttgagtgagccgagatcccgccactgcactccagcctggcgac
agagcgagactccgtctcaaaaaaaaaaaaaaaaaTAATAATTTATTTTCCTCTCTATTGAGAGGCTCATGACAGGAGGTAATAA
CTGAAGTACGCTATAATTTGGGCAGGACCTGTATTGGAGCTCTTACTGCTTTTATTTTATGATGATTCTTGGGGGAG
TTTGGGAGATTGTTCTTTTTGTTTTGTTTCTGTGTGTATCTACGTGTGTGATACATATACTAGAAAAGCTGTTCT
TTTTCTTTGGTTATAAATGAAGCTTGAGAAGTAATTCTGTAGCAAACTGAACTAGGTAGAGTAGTCATGTTTGT
GACGTTAAAGCAGCCATTTGCCAACCTATTAATGGTTTTATCTGTTTTCTGTGACATGTATATTTATAAATACTGT
GTTTACAGAGGCATTTAACTTTCCCTTCGTTTGTAAAACATAAGAGATGCTTTTAAATGTTTACGTGCCATTAGATATT
TAAGATAATACCGCTCCAACTTTTATTCTTTCTAAGTATAAAGTTGCAGAATTAGCTTGAATACTGATTTACAGCTG
CATGAAATGAATATAGAGCAGCTGTCCAAATTAAGTTAAAAACAAAGGAAGTTCCTGTGTGTCGTTTCTGTCTCT
TAAAAGCAAACAAAAAATTTCCATAATTATTAAGTCTTTTCCAGAGTGTCTCTAATATTAAGTGTGAATTTTGGTA
TTTTCAGTGTGCTGAATTGTTGGATGTTCTTGTCTCACCTATTAAGGACATTTTCTAAAAGGTAATGATTTGTTTT
CTTTTCTTTATCAGAGCACTGCCATGTTGAGCAAGGGCGAGGAGGATAACATGGCCATCATCAAGGAGTTCA
TGCGCTTCAAGGTGCACATGGAGGGCTCCCGTGAACGGCCACGAGTTCGAGATCGAGGGCGAGGGCGAGGG
CCGCCCCACGAGGGCACCCAGACCGCCAAGCTGAAGGTGACCAAGGGTGGCCCCCTGCCCTTCGCTTGG
GACATCCTGTCCCTCAGTTCATGTACGGCTCCAAGGCCTACGTGAAGCACCCCGCCGACATCCCCGACT
ACTTGAAGCTGTCTTCCCGAGGGCTTCAAGTGGGAGCGCGTGATGAACTTCGAGGACGGCGCGCTGGT
GACCGTGACCCAGGACTCCTCCCTGCAGGACGGCGAGTTCATCTACAAGGTGAAGCTGCGCGGCACCAAC
TTCCCCCTCCGACGGCCCCGTAATGCAGAAGAAGACCATGGGCTGGGAGGCCTCCTCCGAGCGGATGTACC
CCGAGGACGGCGCCCTGAAGGGCGAGATCAAGCAGAGGCTGAAGCTGAAGGACGGCGGCCACTACGACGC
TGAGGTCAAGACCACCTACAAGGCCAAGAAGCCCGTGCAGCTGCCCGGCCTACAACGTCAACATCAAG
TTGGACATCACCTCCACAACGAGGACTACACCATCGTGGAAACAGTACGAACGGCGCCGAGGGCCGCCACT
CCACCGCGGCATGGACGAGCTGTACAAGTCCCGAAGTGCTGGGAGCGCAAGCGGAAGCGGAGGCTCCGG
TGAGGAAACAGCTATATGGGAACAACATACAGTGACGCTTACAGGGTAAGTTTGTGTTGCAGTAAGTAATCTGT
GTATAACTCAGGATACTGGCAGCTTTGAAAACAATAGAGGAAAGCCAGATGTCAGGAAGCCAGAGGGAGGAGG
AACTTTTTCTATATCTTTTGTAAAATTAGAGTTACAATAATTTTTTATTAAGGTCAAAGTGAGCATGATTACT
TTTTCATATATCCTTTGAGTATTTGCTGTTTTATTCCTGACTTAAAAAGTGATTTGCTTTTAAAAATTTGAGTGATC
AGATAAAAGACTCTGTACATTAGTATAAATTATTATAAACTGCTTCAACCTTTCTGAGTATATATGCATCCATTGTG
GGAGTGAAGTTTGAATTAACCAGTTGTATGCATAATAAAATCCTAAAAGATACTTAATTGATTTCAAACATGT
TGACCCAAGCTGTTGCTTAAACAATTGCAGATGCGAGAAGAGAGATGAGTAGTAGTAAGAGATGAGTTCTTACTT
GGTGGgactaagaactttgtccgaagtgagactgctatcaatttgaattctggttctgctttctctttagaaatggggaagtgattcagtcacc
ttcgaaaaccttggtttcacaagttaaaatggAACAAGTTGACACCAGTTCATGCTTTACCAATTTGTAAAGTTAAGTGTCTC
TCAAATTTCTTTTCTCTCTTTCAAGAGAGCTGAATCTACTGATTACTCCCTTTCTTAGAGAATGTATGGAAAGAG
AGAATATTTAAATACTGGCCTTGCACCTTACACTTACTATTTCTACCAGCTATATCCATTATTAGGAAGATGGAAAG
GGGAAAGAATCATGTTGCTGGACTCTGCCCTGATTATCTCACGAATGTTTGGATCTGCACATAGTAGATAATGGG
TAAATTAATTATAAAAAATAGTTGTTTTggctgggtgtggtggctcacgct
```

**Mutation to avoid “NGG” or gRNA cutting**

**mCherry gene**

**Spacer**

**Movie S1.** Time-lapse movie of mCherry-tagged ZO-1 at the apical side of Caco-2 cells stimulated by nanotopographic cues, showing cytosolic ZO-1 proteins cluster into puncta within a network next to junctions. This movie represents images in Fig. 3A-ii.

**Movie S2.** Time-lapse movie of mCherry-tagged ZO-1 at the apical side of Caco-2 cells stimulated by nanotopographic cues, showing apical cytosolic complex circulates while collecting smaller ZO-1 structures which then moves basolaterally. This movie represents images in Fig. 3A-iv.

**Movie S3.** Time-lapse movie of mCherry-tagged ZO-1 at the apical side of Caco-2 cells stimulated by nanotopographic cues, showing active remodeling of cytosolic complexes and their interaction with junction-associated structures.

**Movie S4.** Time-lapse movie of mCherry-tagged ZO-1 (purple) and YFP-tagged claudin-3 (green) at the apical side of Caco-2 cells stimulated by nanotopographic cues, showing the involvement of both proteins in the initiation of complex formation and cytosolic migration. This movie represents images in Fig. 4C.

**Movie S5.** Time-lapse movie of mCherry-tagged ZO-1 (purple) and live-stained F-actin (green) at the apical side of Caco-2 cells stimulated by nanotopographic cues, showing: i) disappearance of ZO-1 concomitant with the appearance of F-actin; ii) F-actin wrapped around ZO-1 in cytosolic complex next to a tight junction; and iii) a large ZO-1 cytosolic complex lack of F-actin. This movie represents images in Fig. 5B.
